# Supplementary material for: Coordination of fungal biofilm development by extracellular vesicle cargo
Source: Nat Commun. 2021 Oct 29;12:6235. doi: 10.1038/s41467-021-26525-z (PMC8556236; doi:10.1038/s41467-021-26525-z)
Supplement: Supplementary file 3 — Supplementary Data 1 [file 41467_2021_26525_MOESM3_ESM.xlsx]

## Sheet: EV
Supplementary Data 1|Exosomal proteomes of C. albicans WT and ESCRT mutants biofilms
			Strains →	WT	HSE1-/-	VPS27-/-	MVB12-/-	VPS23-/-	VPS28-/-	SRN2-/-	VPS25-/-	VPS36-/-	VPS22-/-	VPS2-/-	VPS24-/-	VPS20-/-	SNF7-/-	VTI1-/-	VPS4-/-	BRO1-/-	DOA4-/-
Gene	UniProt ID	Protein name	ESCORT type →	WT	0	0	I	I	I	I	II	II	II	III	III	III	III	DS	DS	DS	DS
SAP5	P43094	Candidapepsin-5		1353.2	315.75	241.13	292.11	115.53	83.369	83.017	148.92	136.67	683.01	277.88	307.76	111.68	433.32	1512.8	345	465.78	335.17
PRA1	P87020	pH-regulated antigen		410.095	190.13	361.7	70.107	35.942	63.753	33.822	31.588	16.078	226.68	429.09	292.37	30.458	129.12	486.26	357.87	306.66	143.64
ALS3	Q59L12	Agglutinin-like protein		352.345	64.507	37.892	56.086	25.673	14.712	27.672	13.538	8.0392	80.53	49.038	34.623	10.153	45.959	217.4	43.769	60.754	59.851
HYR1	A0A1D8PFM8	Hyphally regulated cell wall protein		284.388	271.61	110.23	322.49	148.9	68.657	144.51	85.739	88.432	199.83	267.67	192.35	96.45	161.95	265	308.96	254.59	125.69
MP65	Q59XX2	Cell surface mannoprotein		187.447	135.8	168.79	268.74	136.06	127.51	181.41	205.32	148.73	113.34	220.67	169.27	182.75	157.57	159.51	198.25	147.54	167.58
orf19.1239	Q5A470	Uncharacterized protein		186.888	638.28	475.37	275.76	192.54	93.177	199.86	241.42	180.88	408.62	138.94	207.74	86.298	135.69	271.43	221.42	318.23	101.75
SUN41	Q59NP5	Secreted beta-glucosidase		186.655	115.43	82.673	259.4	71.883	127.51	104.54	205.32	180.88	226.68	120.55	146.19	213.21	186.02	212.25	146.75	107.04	131.67
PHR1	P43076	pH-responsive protein		176.617	183.34	161.9	49.075	7.7018	4.9041	9.2241	22.563	16.078	44.739	49.038	65.399	5.0763	21.885	155.65	110.71	164.9	77.807
BGL2	Q5AMT2	Glucan 1,3-beta-glucosidase		171.277	84.878	79.229	42.064	23.105	24.52	24.598	27.075	20.098	71.582	42.909	46.164	10.153	41.582	117.06	77.239	115.72	53.866
SAP6	Q5AC08	Candidapepsin-6		164.424	61.112	37.892	35.054	28.24	19.616	21.523	60.92	36.177	86.495	73.558	65.399	20.305	35.016	182.67	56.642	92.577	59.851
OP4	A0A1D8PFJ9			120.828	190.13	165.35	123.86	53.912	44.137	58.42	13.538	16.078	38.774	24.519	34.623	15.229	19.697	64.32	115.86	135.97	71.821
TOS1	A0A1D8PJA8			110.259	98.458	75.784	268.74	69.316	73.561	116.84	230.14	116.57	65.617	200.24	119.26	167.52	140.06	111.92	144.18	83.898	83.792
ECM33	A0A1D8PCY4			97.4198	84.878	72.339	123.86	35.942	73.561	64.569	58.664	48.235	41.756	34.736	38.47	35.534	76.598	46.31	95.261	112.83	47.881
CHT2	P40953	Chitinase		93.7048	84.878	55.116	70.107	17.971	14.712	18.448	13.538	16.078	32.809	40.865	30.776	30.458	35.016	73.324	64.366	54.968	59.851
orf19.2460	A0A1D8PDR3	Uncharacterized protein		90.4282	101.85	86.118	42.064	28.24	9.8081	24.598	9.0252	8.0392	23.861	28.606	15.388	0	13.131	84.902	43.769	83.898	5.9851
RBT4	A0A1D8PDY8	Secreted protein		86.33	30.556	6.8894	60.76	17.971	9.8081	15.374	24.819	8.0392	26.843	24.519	3.847	10.153	26.262	96.479	64.366	78.112	47.881
RBT1	Q59TP1	Cell wall protein		80.8278	71.298	55.116	70.107	30.807	4.9041	18.448	13.538	8.0392	23.861	53.125	50.011	5.0763	17.508	100.34	92.687	86.791	35.911
GND1	A0A1D8PFS4	6-phosphogluconate dehydrogenase		56.25	10.185	10.334	18.695	7.7018	9.8081	9.2241	9.0252	0	8.9478	4.0865	3.847	0	6.5655	43.737	7.7239	8.6791	0
ENO1	P30575	Enolase		53.4813	13.58	27.558	35.054	30.807	58.849	33.822	60.92	40.196	38.774	38.822	34.623	25.382	61.278	39.878	33.47	23.144	35.911
SOD5	Q5AD07	Cell surface superoxide dismutase		52.2698	30.556	31.003	25.706	7.7018	9.8081	9.2241	9.0252	16.078	14.913	24.519	26.929	5.0763	4.377	29.587	28.321	11.572	17.955
PLB4.5	A0A1D8PGF0	Lysophospholipase		51.0842	37.346	13.779	25.706	12.836	4.9041	12.299	11.281	4.0196	14.913	18.389	3.847	10.153	15.32	30.873	33.47	40.502	17.955
EFT2	Q5A0M4	Elongation factor		50.5582	23.766	10.334	30.38	10.269	4.9041	9.2241	15.794	4.0196	11.93	20.433	3.847	0	28.451	50.169	20.597	14.465	0
HEX1	A0A1D8PNR7	Beta-hexosaminidase		50.197	20.371	20.668	95.813	25.673	19.616	73.793	38.357	16.078	47.722	104.21	57.705	40.611	41.582	50.169	48.918	37.609	0
GCA2	A0A1D8PEW1			48.0593	101.85	127.45	273.42	115.53	88.273	476.58	103.79	84.412	110.36	175.72	96.176	101.53	129.12	36.019	113.28	72.326	11.97
ENG1	Q5AIR7	Endo-1,3-glucanase		46.544	47.532	48.226	105.16	51.345	34.328	52.27	24.819	48.235	53.687	38.822	50.011	35.534	26.262	36.019	28.321	31.823	11.97
MSB2	A0A1D8PGF8			44.1173	13.58	0	14.021	2.5673	0	3.0747	0	0	5.9652	2.0433	0	0	6.5655	19.296	7.7239	8.6791	5.9851
ASM3	Q5ABD3			41.283	27.161	17.224	51.412	28.24	4.9041	43.046	13.538	8.0392	20.878	79.687	34.623	25.382	21.885	33.446	25.746	37.609	17.955
PGK1	P46273	Phosphoglycerate kinase		40.891	37.346	20.668	25.706	25.673	24.52	24.598	33.844	28.137	41.756	18.389	3.847	10.153	45.959	33.446	12.873	11.572	0
ECE1	Q07730	Extent of cell elongation protein		39.5205	57.717	120.57	16.358	12.836	9.8081	12.299	2.2563	8.0392	8.9478	26.562	7.6941	5.0763	6.5655	30.873	48.918	89.684	17.955
HSP90	P46598	Heat shock protein 90 homolog		38.4775	23.766	13.779	23.369	17.971	34.328	18.448	27.075	20.098	14.913	24.519	26.929	10.153	37.205	21.869	23.172	26.037	11.97
CRH11	Q5AFA2	Extracellular glycosidase		38.265	57.717	24.113	49.075	30.807	24.52	39.971	13.538	12.059	23.861	42.909	11.541	0	26.262	32.16	43.769	31.823	35.911
FBA1	Q9URB4	Fructose-bisphosphate aldolase		38.033	3.3951	3.4447	14.021	12.836	4.9041	6.1494	13.538	0	2.9826	14.303	0	0	15.32	42.451	7.7239	8.6791	0
XOG1	P29717	Glucan 1,3-beta-glucosidase		37.7812	30.556	37.892	79.455	33.374	9.8081	39.971	27.075	4.0196	20.878	49.038	19.235	10.153	41.582	29.587	33.47	11.572	0
SCW11	A0A1D8PNW1	Glucan endo-1,3-beta-D-glucosidase		35.947	13.58	17.224	53.749	20.538	34.328	27.672	40.613	32.157	35.791	26.562	30.776	30.458	41.582	36.019	12.873	8.6791	0
GLX3	Q5AF03	Glyoxalase		35.7755	44.137	44.781	39.728	25.673	19.616	21.523	13.538	20.098	17.896	22.476	11.541	0	17.508	14.15	54.067	34.716	5.9851
PDC11	P83779	Pyruvate decarboxylase		35.6803	6.7902	0	18.695	5.1345	19.616	6.1494	15.794	20.098	11.93	8.1731	19.235	0	17.508	28.301	5.1493	8.6791	0
GAM1	O74254	Glucoamylase		35.675	95.063	120.57	243.04	100.12	73.561	412.01	76.714	0	89.478	149.16	61.552	0	87.54	34.733	100.41	63.647	0
TAL1	Q5A017	Transaldolase		35.4072	20.371	17.224	14.021	15.404	29.424	9.2241	20.307	12.059	17.896	26.562	19.235	15.229	32.828	37.305	15.448	20.251	11.97
SIM1	Q5AKU5	Secreted beta-glucosidase		34.6763	6.7902	6.8894	35.054	5.1345	14.712	6.1494	6.7689	12.059	14.913	4.0865	3.847	0	10.943	34.733	5.1493	8.6791	11.97
TPI1	Q9P940	Triosephosphate isomerase		33.6607	16.976	10.334	21.032	10.269	4.9041	3.0747	13.538	12.059	20.878	12.26	11.541	5.0763	24.074	34.733	23.172	23.144	5.9851
SAH1	P83783	Adenosylhomocysteinase		33.1743	3.3951	3.4447	16.358	10.269	9.8081	12.299	9.0252	0	17.896	6.1298	11.541	10.153	10.943	34.733	20.597	14.465	0
SAP4	Q5A8N2	Candidapepsin-4		32.7192	30.556	10.334	16.358	33.374	19.616	30.747	108.3	52.255	50.704	57.211	42.317	15.229	48.147	41.165	74.664	34.716	11.97
PGA4	Q5AJY5	1,3-beta-glucanosyltransferase		31.8685	47.532	37.892	28.043	15.404	4.9041	15.374	24.819	12.059	26.843	14.303	19.235	15.229	21.885	27.014	61.791	54.968	29.926
TIF1	P87206	ATP-dependent RNA helicase		30.5735	6.7902	6.8894	14.021	5.1345	9.8081	6.1494	9.0252	4.0196	17.896	16.346	11.541	0	8.754	28.301	23.172	17.358	5.9851
RBT5	Q59UT4	Repressed by TUP1 protein		30.3029	6.7902	10.334	21.032	2.5673	4.9041	6.1494	4.5126	8.0392	14.913	8.1731	15.388	5.0763	6.5655	25.728	7.7239	5.7861	5.9851
YPS7	Q5AH56	Putative aspartic endopeptidase		30.2548	20.371	17.224	21.032	10.269	4.9041	9.2241	4.5126	4.0196	8.9478	12.26	15.388	5.0763	4.377	27.014	20.597	14.465	5.9851
FAS1	Q5A4W7	Fatty acid synthase subunit beta		29.0482	10.185	0	16.358	2.5673	4.9041	6.1494	42.869	4.0196	8.9478	10.216	7.6941	0	30.639	25.728	7.7239	20.251	0
CHT3	P40954	Chitinase		27.8742	23.766	37.892	53.749	17.971	24.52	27.672	29.332	32.157	23.861	26.562	26.929	10.153	17.508	28.301	23.172	17.358	0
orf19.3499	A0A1D8PPT3	Uncharacterized protein		27.7793	10.185	27.558	35.054	10.269	0	15.374	29.332	12.059	5.9652	28.606	26.929	5.0763	10.943	19.296	46.343	40.502	29.926
ALS1	Q5A8T4	Agglutinin-like protein		27.1473	30.556	13.779	18.695	12.836	0	12.299	9.0252	8.0392	29.826	24.519	19.235	15.229	8.754	27.014	18.022	26.037	11.97
LIP4	A0A1D8PQF5	Lipase		26.5685	0	0	0	0	0	0	0	0	11.93	4.0865	0	0	0	16.723	0	0	0
UTR2	Q5AJC0	Extracellular glycosidase		26.2173	20.371	31.003	23.369	10.269	4.9041	21.523	13.538	16.078	5.9652	10.216	19.235	10.153	10.943	18.009	18.022	14.465	17.955
ADH1	A0A1D8PP43			26.2082	0	0	4.6738	5.1345	4.9041	6.1494	4.5126	0	2.9826	4.0865	0	0	4.377	32.16	5.1493	2.893	0
PGI1	P83780	Glucose-6-phosphate isomerase		24.3047	27.161	17.224	23.369	17.971	14.712	15.374	33.844	20.098	11.93	28.606	26.929	0	17.508	28.301	30.896	28.93	5.9851
PET9	Q5A516	ADP/ATP carrier protein		24.0637	50.927	34.447	25.706	15.404	14.712	15.374	24.819	24.118	23.861	18.389	38.47	5.0763	32.828	33.446	59.217	98.363	23.94
TEF2	Q59QD6	Elongation factor		23.4797	20.371	6.8894	18.695	17.971	19.616	12.299	24.819	12.059	23.861	18.389	15.388	15.229	26.262	27.014	18.022	20.251	5.9851
HET1	A0A1D8PPA5			23.0298	37.346	24.113	11.685	2.5673	14.712	15.374	15.794	8.0392	38.774	12.26	3.847	0	21.885	23.155	20.597	17.358	0
ASC1	P83774	Guanine nucleotide-binding protein		21.8842	13.58	3.4447	16.358	12.836	14.712	21.523	4.5126	0	0	8.1731	3.847	0	8.754	24.441	15.448	14.465	0
FAS2	A0A1D8PK65	Fatty acid synthase subunit alpha		21.7668	3.3951	0	4.6738	0	0	3.0747	22.563	0	0	6.1298	0	0	17.508	21.869	2.5746	2.893	0
PGM2	A0A1D8PSA9	Phosphoglucomutase		21.494	3.3951	6.8894	11.685	5.1345	4.9041	3.0747	2.2563	0	0	8.1731	0	0	0	19.296	15.448	8.6791	0
RAX2	A0A1D8PFE5			21.4095	0	0	32.717	12.836	0	27.672	15.794	0	5.9652	22.476	3.847	0	8.754	15.437	2.5746	8.6791	0
HXK2	P83776	Hexokinase		21.3428	20.371	13.779	4.6738	2.5673	0	3.0747	0	0	0	0	0	0	6.5655	18.009	7.7239	5.7861	0
TDH3	Q5ADM7	Glyceraldehyde-3-P dehydrogenase		21.1423	27.161	27.558	18.695	25.673	63.753	15.374	51.895	44.216	44.739	20.433	26.929	5.0763	48.147	14.15	10.299	26.037	5.9851
orf19.1370	Q59YF6	Uncharacterized protein		20.9302	27.161	37.892	4.6738	0	0	3.0747	0	0	2.9826	0	0	0	0	5.1456	20.597	31.823	0
MNT1	Q00310	Glycolipid 2-alpha-mannosyltransferase		20.5567	27.161	10.334	25.706	12.836	0	15.374	2.2563	4.0196	5.9652	20.433	7.6941	0	17.508	25.728	10.299	17.358	5.9851
MET6	P82610	Homocysteine methyltransferase		20.2614	6.7902	10.334	39.728	12.836	4.9041	3.0747	13.538	0	0	12.26	3.847	0	8.754	16.723	20.597	2.893	0
KAR2	A0A1D8PG96	Hsp70 family ATPase		20.1641	0	0	4.6738	5.1345	4.9041	9.2241	13.538	4.0196	5.9652	8.1731	0	0	10.943	7.7184	0	2.893	0
BMH1	O42766	14-3-3 protein homolog		20.0927	0	6.8894	11.685	15.404	4.9041	6.1494	11.281	12.059	2.9826	2.0433	0	5.0763	2.1885	15.437	5.1493	2.893	11.97
CSH1	Q59QH2			19.054	3.3951	3.4447	14.021	2.5673	9.8081	9.2241	11.281	4.0196	8.9478	4.0865	3.847	0	13.131	11.578	5.1493	17.358	0
PMA1	A0A1D8PJ01	Plasma membrane ATPase		18.5503	57.717	41.337	56.086	77.018	161.83	33.822	187.27	144.71	152.11	61.298	119.26	45.687	194.78	19.296	84.963	54.968	11.97
POR1	P83781	Mitochondrial outer membrane porin		18.1707	54.322	48.226	30.38	25.673	29.424	21.523	42.869	52.255	35.791	18.389	50.011	0	43.77	23.155	28.321	78.112	29.926
AMS1	Q5AF38	Alpha-mannosidase		17.9329	16.976	10.334	112.17	30.807	39.233	55.345	81.226	48.235	32.809	38.822	34.623	0	52.524	11.578	33.47	43.395	0
SSA1	P41797	Heat shock protein		17.3587	23.766	27.558	18.695	23.105	39.233	21.523	38.357	12.059	14.913	8.1731	7.6941	0	21.885	7.7184	15.448	20.251	5.9851
CYP1	P22011	Peptidyl-prolyl cis-trans isomerase		17.2725	23.766	13.779	9.3476	7.7018	9.8081	9.2241	11.281	20.098	14.913	6.1298	3.847	5.0763	17.508	3.8592	7.7239	5.7861	0
PGA45	Q5AA33	Predicted GPI-anchored protein		17.2367	13.58	17.224	11.685	7.7018	0	6.1494	0	0	0	2.0433	0	0	0	7.7184	5.1493	8.6791	11.97
GAD1	A0A1D8PF79	Glutamate decarboxylase		17.0853	0	10.334	28.043	12.836	4.9041	3.0747	6.7689	0	2.9826	4.0865	0	0	6.5655	7.7184	5.1493	0	0
PFY1	Q5A786	Profilin		17.0313	13.58	6.8894	9.3476	0	4.9041	12.299	6.7689	0	11.93	14.303	7.6941	0	10.943	16.723	15.448	14.465	17.955
EXG2	Q5AIA1	Glucan 1,3-beta-glucosidase		17.0212	44.137	31.003	23.369	12.836	4.9041	9.2241	9.0252	0	5.9652	18.389	23.082	0	4.377	18.009	30.896	49.182	17.955
ARF2	Q5AND9	Arf family GTPase		16.7553	27.161	13.779	16.358	2.5673	14.712	9.2241	13.538	24.118	59.652	12.26	15.388	5.0763	26.262	18.009	7.7239	8.6791	5.9851
RPL10A	Q9UVJ4	60S ribosomal protein L10a		16.6252	3.3951	0	0	0	0	0	0	0	2.9826	0	0	0	2.1885	10.291	2.5746	0	0
PGA17	A0A1D8PGU3	Predicted GPI-anchored protein		16.2493	0	3.4447	7.0107	0	0	3.0747	0	0	0	2.0433	3.847	0	2.1885	7.7184	2.5746	23.144	0
orf19.3852	A0A1D8PT50	Uncharacterized protein		16.2064	3.3951	0	18.695	10.269	0	24.598	24.819	8.0392	0	24.519	23.082	10.153	6.5655	24.441	5.1493	2.893	0
orf19.2489	A0A1D8PDL7	Uncharacterized protein		16.1326	0	0	4.6738	2.5673	0	3.0747	0	0	0	0	0	0	2.1885	10.291	2.5746	2.893	0
ATC1	Q5AAU5	Cell wall acid trehalase		16.0315	10.185	6.8894	16.358	5.1345	0	15.374	2.2563	4.0196	2.9826	8.1731	0	0	6.5655	15.437	5.1493	8.6791	0
orf19.1766	A0A1D8PIN7	Uncharacterized protein		15.5702	10.185	3.4447	9.3476	2.5673	4.9041	3.0747	4.5126	0	8.9478	0	3.847	5.0763	4.377	14.15	2.5746	8.6791	0
MLS1	Q5APD2	Malate synthase		15.401	0	0	2.3369	2.5673	0	0	0	0	2.9826	0	3.847	0	6.5655	21.869	0	5.7861	0
MIR1	Q5AP79			15.3955	37.346	37.892	25.706	12.836	4.9041	9.2241	13.538	8.0392	17.896	8.1731	15.388	0	28.451	20.582	30.896	54.968	0
CIT1	A0A1D8PSH3	Citrate synthase		15.1154	6.7902	10.334	23.369	10.269	4.9041	12.299	13.538	4.0196	0	10.216	3.847	0	4.377	15.437	10.299	17.358	0
CAR2	A0A1D8PL14	Ornithine aminotransferase		15.0015	10.185	3.4447	14.021	15.404	9.8081	6.1494	24.819	8.0392	11.93	10.216	7.6941	5.0763	15.32	11.578	7.7239	8.6791	0
AHP1	Q5AF44	Peroxiredoxin		14.5245	3.3951	3.4447	16.358	10.269	9.8081	6.1494	2.2563	0	0	12.26	0	0	10.943	18.009	2.5746	2.893	0
COI1	Q5A799			14.2055	10.185	6.8894	37.391	17.971	19.616	24.598	22.563	28.137	53.687	22.476	26.929	30.458	41.582	15.437	7.7239	8.6791	5.9851
CSA2	Q5A0X8	Surface antigen protein		14.1792	0	0	7.0107	0	0	0	0	0	8.9478	6.1298	3.847	0	0	19.296	0	0	5.9851
KEX2	A0A1D8PEG3	Kexin		14.0105	13.58	0	30.38	20.538	0	24.598	11.281	8.0392	11.93	14.303	3.847	5.0763	8.754	10.291	10.299	8.6791	0
YOS9	Q5ACR4	Protein OS-9 homolog		13.6205	10.185	3.4447	9.3476	5.1345	0	9.2241	4.5126	8.0392	11.93	6.1298	3.847	5.0763	13.131	12.864	7.7239	2.893	0
MNT2	P46592	Glycolipid 2-alpha-mannosyltransferase		13.4908	33.951	17.224	7.0107	7.7018	0	3.0747	0	0	5.9652	6.1298	0	0	4.377	12.864	15.448	14.465	0
ADH2	O94038	Alcohol dehydrogenase		13.0419	0	0	0	0	0	0	0	0	0	0	0	0	0	15.437	0	0	0
ACT1	A0A1D8PFR4	Actin		12.83	6.7902	3.4447	7.0107	12.836	4.9041	9.2241	4.5126	20.098	8.9478	6.1298	15.388	20.305	10.943	6.432	5.1493	0	11.97
SCW4	Q5AIB2			12.8273	10.185	3.4447	9.3476	2.5673	0	3.0747	0	0	0	0	0	0	0	3.8592	2.5746	5.7861	0
SAP9	Q59SU1	Candidapepsin-9		12.7402	23.766	6.8894	11.685	2.5673	4.9041	6.1494	9.0252	4.0196	14.913	4.0865	11.541	10.153	8.754	15.437	10.299	5.7861	5.9851
PCK1	A0A1D8PRM7	Phosphoenolpyruvate carboxykinase		11.8385	0	0	0	0	0	0	0	0	0	0	0	0	0	21.869	0	0	0
TSA1	Q9Y7F0	Peroxiredoxin		11.8234	6.7902	6.8894	7.0107	5.1345	14.712	3.0747	4.5126	8.0392	5.9652	0	0	0	6.5655	10.291	2.5746	8.6791	0
PEP1	A0A1D8PFH5	Sortilin		11.822	6.7902	3.4447	4.6738	5.1345	0	6.1494	6.7689	8.0392	5.9652	10.216	11.541	10.153	4.377	11.578	5.1493	8.6791	5.9851
CDC19	P46614	Pyruvate kinase		11.8199	3.3951	3.4447	46.738	23.105	29.424	18.448	27.075	16.078	14.913	18.389	0	5.0763	35.016	18.009	0	2.893	5.9851
BMT6	Q5ABU8,A0A1D8PQ28	Beta-mannosyltransferase		11.8096	3.3951	0	4.6738	0	0	0	0	0	0	0	0	0	0	3.8592	0	0	0
UBI3	Q5A109	Ubiquitin-ribosomal 40S subunit protein S31		11.7141	57.717	20.668	18.695	15.404	14.712	18.448	13.538	8.0392	14.913	26.562	11.541	5.0763	26.262	9.0047	30.896	28.93	17.955
TKL1	Q5A750	Transketolase		11.6411	0	0	2.3369	2.5673	0	3.0747	6.7689	0	0	4.0865	3.847	0	4.377	7.7184	5.1493	2.893	0
RHO1	O42825	GTP-binding protein		11.6107	47.532	34.447	18.695	10.269	24.52	18.448	22.563	40.196	47.722	10.216	26.929	25.382	39.393	3.8592	25.746	14.465	0
LAP41	A0A1D8PJE0	Metalloaminopeptidase		11.4734	33.951	13.779	35.054	23.105	58.849	33.822	40.613	24.118	14.913	26.562	19.235	5.0763	39.393	6.432	12.873	20.251	0
PMM1	P31353	Phosphomannomutase		11.4485	10.185	3.4447	7.0107	0	0	3.0747	4.5126	0	5.9652	6.1298	3.847	0	2.1885	9.0047	7.7239	2.893	0
MNN24	Q5AD72	Alpha-1,2-mannosyltransferase		11.4258	3.3951	0	0	0	0	0	0	0	0	0	0	0	0	7.7184	5.1493	14.465	0
TRX1	A0A1D8PU69	Thioredoxin		11.3809	6.7902	3.4447	11.685	15.404	19.616	9.2241	20.307	12.059	23.861	12.26	30.776	10.153	17.508	12.864	5.1493	14.465	0
YNK1	Q5AG68	Nucleoside diphosphate kinase		11.2827	6.7902	6.8894	4.6738	5.1345	4.9041	0	2.2563	0	2.9826	2.0433	0	0	2.1885	9.0047	10.299	5.7861	5.9851
orf19.6741	A0A1D8PKU6	Uncharacterized protein		11.2422	27.161	17.224	21.032	7.7018	4.9041	18.448	4.5126	16.078	2.9826	4.0865	7.6941	0	13.131	9.0047	10.299	5.7861	0
CYP5	A0A1D8PKL0	Peptidyl-prolyl cis-trans isomerase		11.1255	3.3951	3.4447	4.6738	0	0	3.0747	2.2563	0	2.9826	4.0865	3.847	0	2.1885	7.7184	5.1493	5.7861	5.9851
CAM1	A0A1D8PKC3	Translation elongation factor EF1B gamma		11.0921	3.3951	3.4447	4.6738	0	0	0	0	0	2.9826	2.0433	0	0	6.5655	9.0047	0	0	0
IDI1	A0A1D8PLI2	Isopentenyl-diphosphate delta-isomerase		10.8219	0	0	0	0	0	0	0	0	0	0	0	0	0	5.1456	5.1493	2.893	0
SSR1	Q5AFN8	Covalently-linked cell wall protein		10.8104	20.371	24.113	9.3476	5.1345	9.8081	6.1494	11.281	20.098	14.913	10.216	26.929	15.229	15.32	12.864	23.172	26.037	17.955
RBE1	Q59ZX3	Repressed by EFG1 protein 1		10.4577	0	0	23.369	2.5673	0	3.0747	0	0	11.93	0	0	0	4.377	15.437	0	0	0
PBR1	Q5AAN7			10.4462	37.346	13.779	14.021	12.836	24.52	24.598	18.05	24.118	20.878	65.385	38.47	10.153	19.697	7.7184	23.172	17.358	11.97
DCW1	Q5AD78	Mannan endo-1,6-alpha-mannosidase		9.9233	3.3951	3.4447	2.3369	5.1345	0	0	4.5126	0	2.9826	2.0433	0	0	4.377	6.432	7.7239	2.893	0
CRM1	A0A1D8PRR9	Exportin		9.5871	3.3951	0	2.3369	0	0	0	0	0	0	0	0	0	0	9.0047	0	0	0
ZWF1	A0A1D8PEG2	Glucose-6-phosphate 1-dehydrogenase		9.5667	0	0	11.685	2.5673	0	0	2.2563	0	0	2.0433	0	0	0	3.8592	2.5746	0	0
ALS4	A0A1D8PQB9	Agglutinin-like protein 4		9.5249	47.532	13.779	28.043	10.269	4.9041	9.2241	9.0252	8.0392	11.93	18.389	7.6941	5.0763	6.5655	2.5728	23.172	8.6791	5.9851
COF1	A0A1D8PMW6	Cofilin		9.4169	10.185	3.4447	4.6738	0	0	0	2.2563	0	8.9478	4.0865	3.847	0	4.377	6.432	2.5746	5.7861	0
ERO1	A0A1D8PER8	ER oxidoreductin		9.365	0	0	0	0	0	0	0	0	0	0	0	0	4.377	9.0047	0	0	0
orf19.7322	A0A1D8PTY0	Uncharacterized protein		9.3335	10.185	0	2.3369	0	0	0	2.2563	0	0	4.0865	0	0	0	9.0047	7.7239	5.7861	0
GPM1	P82612	Phosphoglycerate mutase		9.2279	3.3951	0	7.0107	2.5673	4.9041	6.1494	2.2563	0	0	4.0865	0	0	2.1885	11.578	2.5746	2.893	0
GRP2	P83775	NADPH-dependent methylglyoxal reductase		9.1985	6.7902	0	7.0107	0	0	0	2.2563	0	0	0	0	0	2.1885	3.8592	20.597	0	0
MNN26	Q59R28	Alpha-1,2-mannosyltransferase		9.0174	3.3951	3.4447	2.3369	2.5673	0	6.1494	2.2563	0	5.9652	2.0433	0	0	2.1885	5.1456	2.5746	0	0
PIR1	Q59SF7	Cell wall mannoprotein		8.9828	3.3951	0	4.6738	0	0	3.0747	2.2563	0	8.9478	0	0	0	4.377	6.432	5.1493	2.893	0
RDI1	Q5AND4			8.9778	16.976	10.334	11.685	7.7018	9.8081	12.299	4.5126	4.0196	14.913	6.1298	3.847	0	8.754	10.291	12.873	8.6791	0
orf19.7214	A0A1D8PFV8	17-beta-OH-steroid dehydrogenase-like		8.8311	3.3951	0	0	0	0	0	0	0	0	0	0	0	0	1.2864	0	0	0
CEF3	P25997	Elongation factor 3		8.7147	3.3951	0	7.0107	0	0	0	4.5126	0	0	0	3.847	0	4.377	3.8592	12.873	14.465	0
orf19.1946	Q5A1Q0	Glucose-6-phosphate 1-epimerase		8.2567	3.3951	3.4447	2.3369	2.5673	0	3.0747	4.5126	4.0196	2.9826	6.1298	3.847	0	4.377	9.0047	2.5746	2.893	0
XYL2	A0A1D8PUB4	L-iditol 2-dehydrogenase		8.2125	0	0	4.6738	2.5673	4.9041	0	0	0	0	0	0	0	4.377	12.864	0	5.7861	0
PDI1	A0A1D8PR99	Protein disulfide isomerase		7.9264	6.7902	10.334	9.3476	0	0	3.0747	0	0	0	0	0	0	2.1885	3.8592	7.7239	14.465	0
orf19.6119	A0A1D8PTI1	Uncharacterized protein		7.8557	6.7902	6.8894	7.0107	5.1345	4.9041	6.1494	2.2563	0	5.9652	2.0433	0	0	4.377	5.1456	2.5746	2.893	0
UBA1	A0A1D8PKJ3	E1 ubiquitin-activating protein		7.824	0	0	0	0	0	0	0	0	0	0	0	0	0	1.2864	0	0	0
orf19.86	Q59WW7	Glutathione peroxidase		7.7749	23.766	17.224	11.685	2.5673	29.424	6.1494	18.05	28.137	35.791	6.1298	26.929	25.382	30.639	2.5728	10.299	0	0
PLB3	A0A1D8PU17	Lysophospholipase		7.7656	3.3951	6.8894	9.3476	5.1345	9.8081	3.0747	4.5126	0	2.9826	4.0865	3.847	0	6.5655	2.5728	12.873	5.7861	0
IDP2	A0A1D8PS79	Isocitrate dehydrogenase [NADP]		7.7294	0	3.4447	4.6738	2.5673	0	3.0747	0	0	0	0	0	0	0	3.8592	0	0	0
IPP1	P83777	Inorganic pyrophosphatase		7.7012	3.3951	3.4447	2.3369	0	0	0	2.2563	0	0	0	0	0	0	2.5728	2.5746	2.893	0
CHT1	Q5AAH2	Chitinase		7.4913	10.185	0	7.0107	5.1345	0	6.1494	0	0	0	0	0	0	0	7.7184	0	8.6791	0
CBP1	P31225	Corticosteroid-binding protein		7.359	3.3951	0	0	0	0	0	0	0	0	0	0	0	0	3.8592	0	2.893	0
IHD1	Q5A8I8	Induced during hyphae development		7.3459	13.58	3.4447	7.0107	2.5673	4.9041	6.1494	2.2563	0	8.9478	4.0865	3.847	0	6.5655	3.8592	2.5746	0	5.9851
ARF1	P22274	ADP-ribosylation factor		7.2343	0	0	0	0	0	0	0	0	50.704	8.1731	0	0	0	11.578	0	0	0
ERG10	A0A1D8PH52	Acetyl-CoA C-acetyltransferase		7.2007	0	3.4447	2.3369	0	0	3.0747	0	0	0	0	0	0	0	1.2864	2.5746	0	0
LAP3	Q5A6L5	Cysteine proteinase 1, mitochondrial		7.1074	6.7902	3.4447	16.358	5.1345	9.8081	6.1494	29.332	12.059	8.9478	8.1731	15.388	0	13.131	1.2864	5.1493	11.572	0
RAS1	Q59XU5	Ras-like protein		7.0603	20.371	27.558	11.685	12.836	14.712	18.448	11.281	16.078	17.896	6.1298	11.541	0	15.32	0	12.873	14.465	0
ILS1	Q59RI1	Isoleucine--tRNA ligase		6.9704	3.3951	0	0	0	0	0	0	0	0	0	0	0	0	1.2864	2.5746	0	0
SAM2	A0A1D8PF68	S-adenosylmethionine synthase		6.8151	3.3951	3.4447	2.3369	0	0	0	0	0	0	0	0	0	2.1885	3.8592	2.5746	2.893	0
PLB5	A0A1D8PEB1	Lysophospholipase		6.7179	0	0	0	0	0	0	0	0	0	0	0	0	0	7.7184	0	0	0
FDH1	Q59QN6	Formate dehydrogenase		6.6558	0	0	7.0107	2.5673	4.9041	3.0747	4.5126	0	8.9478	2.0433	0	0	10.943	3.8592	0	0	0
CDR1	Q5ANA3	Pleiotropic ABC efflux transporter		6.4794	30.556	24.113	28.043	25.673	58.849	15.374	69.945	40.196	56.669	28.606	50.011	0	61.278	9.0047	36.045	23.144	0
VMA13	A0A1D8PSX0	V-type proton ATPase subunit H		6.4612	3.3951	0	2.3369	0	0	0	0	0	0	0	0	0	0	1.2864	0	2.893	0
GLK1	Q59TZ8	Phosphotransferase		6.3706	0	0	0	0	0	0	0	0	0	0	0	0	0	5.1456	0	2.893	0
POX1-3	Q5AJD9	Acyl-coenzyme A oxidase		6.3584	6.7902	3.4447	42.064	7.7018	4.9041	12.299	18.05	4.0196	0	22.476	3.847	0	13.131	10.291	5.1493	20.251	0
GLC3	A0A1D8PQ59	1,4-alpha-glucan branching enzyme		6.1484	0	0	0	0	0	0	0	0	0	0	0	0	0	5.1456	0	0	0
RPL12	Q5AJF7	Ribosomal 60S subunit protein L12A		6.1459	0	0	2.3369	2.5673	4.9041	0	0	0	0	0	0	0	2.1885	3.8592	0	0	0
orf19.4248	A0A1D8PNF2	Acyl-protein thioesterase		6.0856	0	0	0	0	0	0	0	0	0	0	0	0	2.1885	5.1456	2.5746	0	0
PGA52	Q59L72	GPI-anchored protein		6.0326	16.976	6.8894	9.3476	2.5673	0	6.1494	6.7689	4.0196	2.9826	2.0433	7.6941	5.0763	10.943	2.5728	12.873	8.6791	0
UBC4	A0A1D8PU40	E2 ubiquitin-conjugating protein		5.9898	3.3951	3.4447	2.3369	0	0	0	2.2563	0	2.9826	2.0433	3.847	0	2.1885	5.1456	2.5746	2.893	0
TUB1	A0A1D8PTV4	Tubulin alpha chain		5.9837	6.7902	6.8894	2.3369	0	0	0	2.2563	0	0	0	0	0	0	5.1456	2.5746	2.893	0
FET31	A0A1D8PPE2			5.9818	3.3951	3.4447	4.6738	7.7018	0	6.1494	6.7689	4.0196	8.9478	4.0865	7.6941	0	2.1885	5.1456	2.5746	5.7861	0
SAP2	P0DJ06	Candidapepsin-2		5.9573	0	0	0	0	0	0	0	0	0	0	0	0	0	3.8592	0	0	0
CAM1-1	A0A1D8PNN8			5.8915	3.3951	0	4.6738	0	0	0	0	0	2.9826	0	0	0	4.377	5.1456	0	2.893	0
ADE13	A0A1D8PT56	Adenylosuccinate lyase		5.8756	0	0	7.0107	0	0	0	0	0	0	0	0	0	0	1.2864	0	0	0
PST1	A0A1D8PHR5			5.8004	0	0	4.6738	2.5673	4.9041	3.0747	2.2563	8.0392	5.9652	0	3.847	0	2.1885	0	2.5746	0	0
SGA1	Q5AJ73	Glucan 1,4-alpha-glucosidase		5.7727	23.766	20.668	7.0107	0	0	0	0	0	0	8.1731	3.847	0	0	1.2864	18.022	28.93	0
CTR1	Q59NP1	Copper transport protein		5.7565	16.976	6.8894	14.021	15.404	14.712	12.299	33.844	20.098	29.826	16.346	34.623	10.153	37.205	6.432	7.7239	8.6791	0
SEC21	A0A1D8PDE3	Coatomer subunit gamma		5.6824	3.3951	0	2.3369	0	0	0	2.2563	0	0	0	0	0	2.1885	1.2864	0	0	0
SAP8	Q5AEM6	Candidapepsin-8		5.6014	0	0	4.6738	2.5673	0	0	0	4.0196	2.9826	2.0433	0	0	0	2.5728	0	0	0
orf19.4476	A0A1D8PD74	Aldo/ket red domain-containing protein		5.5655	0	3.4447	0	2.5673	0	0	6.7689	0	2.9826	2.0433	0	0	8.754	0	0	0	0
ACS1	Q59XW4	Acetyl-coenzyme A synthetase		5.4898	0	0	0	0	0	0	2.2563	0	2.9826	0	0	0	2.1885	6.432	0	0	0
PST3	A0A1D8PT02	Flavodoxin-like fold family protein		5.4868	6.7902	0	11.685	10.269	9.8081	0	9.0252	4.0196	2.9826	2.0433	0	0	13.131	5.1456	7.7239	11.572	0
GPH1	A0A1D8PQQ3	Alpha-1,4 glucan phosphorylase		5.3618	0	0	2.3369	5.1345	9.8081	0	9.0252	0	2.9826	2.0433	0	0	10.943	2.5728	0	0	0
APR1	Q59U59	Proteinase A		5.2509	13.58	3.4447	14.021	0	0	9.2241	2.2563	4.0196	0	4.0865	0	0	0	5.1456	18.022	14.465	0
UGP1	Q59KI0	UTP--glucose-1-phosphate transferase		5.2378	3.3951	0	2.3369	0	0	0	0	0	0	0	0	0	2.1885	5.1456	2.5746	5.7861	0
FBP1	A0A1D8PKW2	Fructose 1,6-bisphosphate 1-phosphatase		5.2154	0	0	2.3369	0	0	0	0	0	0	0	0	0	4.377	12.864	0	0	0
LYS21	Q59VG1	Homocitrate synthase		5.1648	0	0	0	0	0	0	0	0	0	0	0	0	0	5.1456	0	0	0
RPS0	O42817	40S ribosomal protein S0		5.0961	3.3951	3.4447	0	0	0	0	0	0	0	0	0	0	0	5.1456	2.5746	2.893	0
BMT1	Q5ADQ9	Beta-mannosyltransferase		4.9716	10.185	0	2.3369	0	0	0	0	0	0	0	0	0	0	1.2864	2.5746	5.7861	0
PHR2	O13318	pH-responsive protein		4.9192	16.976	13.779	46.738	30.807	24.52	33.822	56.407	48.235	41.756	30.649	53.858	25.382	43.77	3.8592	48.918	8.6791	11.97
FDH3	A0A1D8PU61	S-hydroxymethyl)GSH dehydrogenase		4.8786	0	0	2.3369	0	0	0	0	0	0	2.0433	0	0	0	3.8592	0	0	0
CAT1	O13289	Peroxisomal catalase		4.8641	3.3951	3.4447	7.0107	0	9.8081	0	2.2563	0	2.9826	4.0865	3.847	0	6.5655	1.2864	2.5746	8.6791	0
SUR7	Q5A4M8			4.7808	30.556	17.224	18.695	17.971	53.945	6.1494	42.869	20.098	47.722	14.303	7.6941	0	30.639	9.0047	20.597	11.572	0
LHS1	A0A1D8PGU0	Hsp70 family chaperone		4.7756	0	0	0	0	0	0	0	0	0	0	0	0	0	1.2864	0	0	0
HRT2	A0A1D8PLC6	Putative methyltransferase		4.7374	0	0	0	0	0	0	0	0	0	0	0	0	0	0	0	0	0
GSC1	A0A1D8PCT0	1,3-beta-glucan synthase		4.7215	13.58	20.668	11.685	7.7018	9.8081	3.0747	9.0252	8.0392	8.9478	2.0433	0	0	13.131	12.864	59.217	26.037	0
SAP10	Q5A651	Candidapepsin-10		4.7161	0	3.4447	4.6738	2.5673	0	3.0747	2.2563	0	0	2.0433	0	0	2.1885	1.2864	2.5746	0	0
PRD1	Q5A2A7	Metalloendopeptidase		4.7107	3.3951	0	0	2.5673	0	0	0	0	0	0	0	0	0	1.2864	0	0	0
GDI1	A0A1D8PFX8	Rab GDP dissociation inhibitor		4.7079	0	0	0	5.1345	0	0	0	0	2.9826	0	0	0	2.1885	5.1456	0	0	0
orf19.3681	Q59VX7	Karyopherin beta		4.675	0	0	0	0	0	0	0	0	0	0	0	0	0	1.2864	2.5746	2.893	0
ICL1	Q59RB8	Isocitrate lyase		4.6499	0	0	0	0	0	0	2.2563	0	0	2.0433	0	0	4.377	2.5728	0	5.7861	0
SOD3	A0A1D8PQH5	Superoxide dismutase		4.6068	0	0	0	2.5673	0	0	4.5126	0	0	0	0	0	2.1885	1.2864	0	0	0
TPD3	Q5ADN1	Protein phosphatase 2A structural subunit		4.5992	0	0	0	0	0	0	0	0	2.9826	0	0	0	0	5.1456	0	0	0
SVF1	Q5ABA2	Survival factor		4.4807	0	0	4.6738	0	0	0	0	0	0	0	0	0	0	1.2864	2.5746	2.893	0
NPC2	Q5A8A2	PG/PI transfer protein		4.417	115.43	62.005	30.38	30.807	29.424	67.644	31.588	44.216	53.687	73.558	34.623	40.611	41.582	3.8592	84.963	37.609	17.955
IFD6	A0A1D8PD78			4.3584	0	0	0	0	0	0	0	0	2.9826	4.0865	0	0	0	6.432	0	0	0
YPT1	Q5AI00	Rab family GTPase		4.3001	3.3951	0	2.3369	7.7018	4.9041	0	2.2563	8.0392	5.9652	2.0433	3.847	0	6.5655	3.8592	5.1493	2.893	0
FUM12	A0A1D8PKV4			4.2142	3.3951	0	2.3369	0	0	0	2.2563	0	0	2.0433	0	0	2.1885	2.5728	2.5746	2.893	0
orf19.2755	A0A1D8PLK1	Proteasome core particle subunit beta 6		4.2036	13.58	17.224	37.391	10.269	19.616	24.598	9.0252	16.078	2.9826	6.1298	7.6941	0	6.5655	1.2864	12.873	20.251	0
RIB3	Q5A3V6	3,4-dihydroxy-2-butanone 4-P synthase		4.0945	0	0	2.3369	2.5673	0	3.0747	6.7689	0	2.9826	2.0433	0	0	2.1885	5.1456	2.5746	0	0
orf19.1054	A0A1D8PD79	Nucleoporin		4.0776	6.7902	3.4447	4.6738	2.5673	0	0	2.2563	0	5.9652	0	0	0	4.377	3.8592	0	5.7861	0
URA5	A0A1D8PS11	Orotate phosphoribosyltransferase		4.0446	0	0	0	0	0	0	0	0	0	0	0	0	0	2.5728	0	0	0
orf19.6883	A0A1D8PHG1	Oxysterol-binding protein		3.9931	0	0	0	2.5673	0	0	0	0	0	2.0433	0	0	0	3.8592	0	0	0
GDH3	A0A1D8PMH8	Glutamate dehydrogenase		3.9782	0	0	7.0107	0	0	6.1494	2.2563	0	2.9826	0	0	0	2.1885	2.5728	0	0	0
STE23	A0A1D8PQ06	Metalloendopeptidase		3.9241	16.976	0	2.3369	0	0	0	0	0	0	0	0	0	0	3.8592	0	2.893	0
orf19.3053	A0A1D8PD11	Uncharacterized protein		3.8957	0	0	2.3369	2.5673	0	0	4.5126	0	0	0	0	0	2.1885	5.1456	10.299	2.893	0
ERG20	A0A1D8PH78	Bifunctional farnesyl diphosphate synthase		3.8864	0	3.4447	0	0	0	0	2.2563	0	0	0	0	0	2.1885	3.8592	0	0	0
SEC27	A0A1D8PPV5	Coatomer		3.8677	0	0	0	0	0	0	0	0	0	0	0	0	0	9.0047	2.5746	0	0
KEX1	Q5AFP8	Pheromone-processing carboxypeptidase		3.8587	6.7902	3.4447	7.0107	2.5673	0	3.0747	0	0	0	2.0433	0	0	0	1.2864	5.1493	5.7861	0
orf19.1229	A0A1D8PE78	Importin-alpha export receptor		3.8287	3.3951	3.4447	2.3369	0	0	0	0	0	0	0	0	0	0	1.2864	2.5746	2.893	0
GSP1	Q59P43	GTP-binding nuclear protein		3.7555	0	0	0	0	0	0	0	4.0196	2.9826	0	0	0	2.1885	3.8592	0	0	0
ACS2	Q8NJN3	Acetyl-coenzyme A synthetase		3.7555	0	0	0	0	0	0	0	0	0	0	0	0	0	3.8592	0	0	0
YKT6	Q5AI79	Palmitoyltransferase		3.7138	16.976	6.8894	0	0	9.8081	6.1494	11.281	12.059	23.861	0	7.6941	5.0763	15.32	2.5728	2.5746	0	0
LSC1	Q5A8X6	Succinate--CoA ligase, mitochondrial		3.7027	0	0	0	0	0	0	0	0	0	0	0	0	0	5.1456	0	2.893	0
ZRT2	A0A1D8PGN5	Low-affinity Zn(2+) transporter		3.6379	16.976	10.334	11.685	7.7018	24.52	3.0747	24.819	32.157	8.9478	6.1298	19.235	0	17.508	1.2864	18.022	14.465	0
HEM13	Q59MR4	Coproporphyrinogen oxidase		3.5901	0	0	0	0	0	0	0	0	0	0	0	0	0	3.8592	0	0	0
IFR2	A0A1D8PSE7			3.5825	3.3951	3.4447	2.3369	2.5673	0	0	0	0	0	4.0865	3.847	0	2.1885	5.1456	2.5746	2.893	0
DUG1	Q5AKA5	Cys-Gly metallodipeptidase		3.5719	0	0	0	0	0	0	0	0	0	0	0	0	0	3.8592	2.5746	0	0
ERG13	A0A1D8PTW6	3-hydroxy-3-methylglutaryl Co A synthase		3.5671	0	0	0	2.5673	0	0	0	0	0	0	0	0	0	2.5728	0	0	0
ERV25	Q5A302	Endoplasmic reticulum vesicle protein		3.5506	10.185	0	2.3369	0	0	3.0747	2.2563	4.0196	2.9826	2.0433	3.847	0	4.377	2.5728	2.5746	2.893	0
EMP46	A0A1D8PTF1			3.5394	6.7902	3.4447	2.3369	5.1345	0	9.2241	11.281	4.0196	14.913	8.1731	7.6941	5.0763	10.943	5.1456	5.1493	5.7861	0
PRY1	Q59PV6	Secreted protein		3.5381	0	0	0	0	0	0	0	0	0	0	0	0	0	2.5728	0	0	0
RPL14	A0A1D8PFL9	Ribosomal 60S subunit protein L14B		3.5057	0	0	0	0	9.8081	0	0	0	0	0	0	0	2.1885	1.2864	0	0	0
DED81	Q59R18	Asparagine--tRNA ligase		3.5013	0	0	0	0	0	0	0	0	0	0	0	0	0	3.8592	0	0	0
MRF1	Q59TU5			3.4979	0	0	0	0	0	0	0	0	0	0	0	0	0	3.8592	0	0	0
orf19.3799	A0A1D8PM53	Reticulon-like protein		3.4438	3.3951	0	2.3369	2.5673	0	0	4.5126	0	0	0	0	0	2.1885	1.2864	0	0	0
AXL2	A0A1D8PM01			3.4351	0	0	4.6738	5.1345	4.9041	9.2241	0	4.0196	0	6.1298	0	0	4.377	2.5728	0	0	0
TUB2	A0A1D8PC97	Tubulin beta chain		3.4244	0	0	0	2.5673	0	0	2.2563	4.0196	0	0	0	0	2.1885	2.5728	0	0	0
PRE6	A0A1D8PSS4	Proteasome endopeptidase complex		3.4146	13.58	10.334	23.369	15.404	14.712	18.448	33.844	8.0392	11.93	20.433	11.541	5.0763	10.943	3.8592	5.1493	11.572	5.9851
GDH2	A0A1D8PI00	NAD-specific glutamate dehydrogenase		3.4042	3.3951	3.4447	0	0	0	0	0	0	0	0	0	0	0	2.5728	2.5746	5.7861	0
CPR6	Q5ACI8	Peptidyl-prolyl cis-trans isomerase D		3.3784	0	3.4447	2.3369	0	0	3.0747	2.2563	4.0196	2.9826	2.0433	3.847	0	2.1885	1.2864	2.5746	0	0
MCR1	Q59M70	NADH-cytochrome b5 reductase		3.3471	6.7902	0	0	0	0	0	0	0	2.9826	0	0	0	0	1.2864	0	0	0
SSB1	Q5A397	Hsp70 family ATPase		3.3234	0	3.4447	2.3369	2.5673	4.9041	0	4.5126	0	0	0	0	0	4.377	1.2864	0	0	0
HGT1	A0A1D8PCL1	High-affinity glucose transporter		3.2651	6.7902	3.4447	7.0107	0	0	0	6.7689	0	5.9652	2.0433	19.235	0	2.1885	3.8592	18.022	5.7861	0
AHA1	A0A1D8PU72			3.2479	3.3951	0	2.3369	0	0	0	0	0	0	0	0	0	2.1885	3.8592	2.5746	2.893	0
SPE3	Q59Z50	Spermidine synthase		3.2468	0	0	2.3369	0	0	0	0	0	0	2.0433	0	0	2.1885	2.5728	0	0	0
RPS18	A0A1D8PQQ5	Ribosomal 40S subunit protein S18B		3.2357	0	0	2.3369	0	0	0	2.2563	4.0196	2.9826	2.0433	0	0	2.1885	3.8592	0	0	0
MID1	A0A1D8PNU4			3.2179	0	0	0	0	0	0	0	0	0	0	0	0	0	7.7184	0	0	0
orf19.1448.1	A0A1D8PGE0	Dynein light chain		3.2134	0	0	0	0	0	0	0	0	0	2.0433	0	0	0	1.2864	0	0	0
ATP4	Q59ZE0	F1F0 ATP synthase subunit 4		3.2097	6.7902	6.8894	7.0107	2.5673	4.9041	0	9.0252	0	0	0	3.847	0	8.754	5.1456	2.5746	14.465	0
APE3	A0A1D8PI95	Peptide hydrolase		3.1253	3.3951	3.4447	2.3369	0	0	0	0	0	0	0	0	0	0	0	5.1493	5.7861	0
KRE9	Q5ANN9			3.1253	0	3.4447	7.0107	2.5673	0	3.0747	11.281	12.059	0	6.1298	11.541	15.229	6.5655	3.8592	5.1493	2.893	0
PSA2	Q5AL34			3.1253	3.3951	0	2.3369	0	4.9041	0	2.2563	0	2.9826	2.0433	0	0	2.1885	5.1456	2.5746	2.893	0
orf19.3375	A0A1D8PLU2	Uncharacterized protein		3.1058	0	0	2.3369	0	0	0	2.2563	0	5.9652	2.0433	0	0	2.1885	2.5728	2.5746	2.893	0
CFL2	A0A1D8PME3			3.101	10.185	6.8894	9.3476	0	0	0	0	0	2.9826	2.0433	15.388	0	2.1885	5.1456	7.7239	8.6791	0
PUP3	A0A1D8PRB6	Proteasome core particle subunit beta 3		3.0992	10.185	10.334	16.358	5.1345	9.8081	21.523	9.0252	4.0196	2.9826	16.346	3.847	0	13.131	5.1456	12.873	17.358	0
RPP0	A0A1D8PQS0	60S acidic ribosomal protein P0		3.0811	6.7902	10.334	0	0	4.9041	3.0747	0	0	0	4.0865	0	0	2.1885	2.5728	5.1493	8.6791	0
PHO113	Q59UY6	Acid phosphatase		3.0799	0	0	16.358	10.269	9.8081	36.897	20.307	24.118	20.878	10.216	15.388	5.0763	24.074	1.2864	5.1493	2.893	0
PRE8	A0A1D8PTY6	Proteasome endopeptidase complex		2.9105	6.7902	6.8894	25.706	10.269	19.616	15.374	27.075	20.098	2.9826	14.303	11.541	0	17.508	5.1456	10.299	17.358	0
RPN1	A0A1D8PFL7	26S proteasome regulatory subunit		2.9031	3.3951	3.4447	7.0107	2.5673	0	0	2.2563	4.0196	0	0	0	0	2.1885	1.2864	2.5746	2.893	0
RPS12	Q5ADQ6	40S ribosomal protein S12		2.8632	3.3951	0	2.3369	0	0	0	0	0	0	0	0	0	0	1.2864	2.5746	2.893	0
CIP1	A0A1D8PPI6			2.8586	0	0	0	0	0	0	2.2563	0	0	0	0	0	0	1.2864	0	0	0
TUP1	P0CY34	Transcriptional repressor		2.8521	0	0	4.6738	0	0	0	0	0	0	0	0	0	0	2.5728	0	0	0
CHC1	A0A1D8PPS9	Clathrin heavy chain		2.8158	0	0	0	0	0	0	0	0	0	0	0	0	2.1885	3.8592	0	0	0
MET15	Q59US5	Aminocarboxypropyltransferase		2.797	0	0	0	0	0	0	2.2563	0	0	0	0	0	0	1.2864	0	0	0
PHO114	Q5AMR2			2.7884	3.3951	0	2.3369	0	0	0	0	0	2.9826	2.0433	0	0	0	5.1456	2.5746	0	0
PHO8	A0A1D8PEV2	Alkaline phosphatase		2.7575	0	0	0	0	0	0	0	0	0	0	0	0	0	1.2864	2.5746	0	0
ROT1	Q5ABP8			2.7535	0	0	2.3369	0	0	0	0	0	0	0	0	0	0	0	2.5746	0	0
orf19.5393	Q5A7S3	Uncharacterized protein		2.7129	0	0	0	0	0	0	2.2563	0	2.9826	2.0433	0	0	2.1885	3.8592	0	2.893	0
RPS22B	P0CU35	40S ribosomal protein S22-B		2.7093	3.3951	0	4.6738	2.5673	4.9041	0	2.2563	0	2.9826	4.0865	0	0	6.5655	2.5728	2.5746	2.893	0
ARG1	A0A1D8PRR5	Argininosuccinate synthase		2.6986	0	0	0	0	0	0	0	0	0	0	0	0	0	1.2864	0	0	0
CDC42	P0CY33	Cell division control protein 42 homolog		2.6968	23.766	0	7.0107	2.5673	4.9041	3.0747	4.5126	8.0392	2.9826	2.0433	0	0	17.508	0	7.7239	0	0
IDH2	A0A1D8PGS5	Isocitrate dehydrogenase, mitochondrial		2.6571	0	0	18.695	2.5673	0	9.2241	6.7689	0	0	10.216	3.847	0	4.377	0	5.1493	5.7861	0
HOM6	Q5AIA2	Homoserine dehydrogenase		2.6461	0	0	0	0	0	0	0	0	0	0	0	0	0	0	0	0	0
orf19.2335	Q59WG6	Aspartyl aminopeptidase		2.597	0	3.4447	14.021	5.1345	34.328	15.374	11.281	4.0196	0	8.1731	0	0	13.131	3.8592	5.1493	8.6791	0
LAT1	Q5AGX8	Acetyltransferase		2.5845	6.7902	3.4447	2.3369	2.5673	0	3.0747	11.281	0	5.9652	4.0865	7.6941	0	8.754	6.432	2.5746	2.893	0
ASN1	A0A1D8PIB2	Asparagine synthase		2.5734	0	0	0	0	0	0	0	0	0	0	0	0	0	1.2864	0	0	0
RBP1	P28870	FK506-binding protein		2.5716	0	0	0	0	0	0	0	0	0	0	0	0	0	1.2864	0	0	0
CAR1	A0A1D8PP00	Arginase		2.558	0	0	0	0	0	0	0	0	0	0	0	0	0	1.2864	0	0	0
SEC14	P46250	Cytosolic factor		2.5479	0	0	0	0	0	0	0	0	0	0	0	0	0	0	0	0	0
SRV2	Q5A6P9	Adenylyl cyclase-associated protein		2.5432	0	0	2.3369	0	0	0	0	0	0	0	0	0	0	0	2.5746	2.893	0
RPL6	A0A1D8PCX8	60S ribosomal protein L6		2.54	0	0	2.3369	0	4.9041	0	2.2563	0	0	0	0	0	2.1885	1.2864	0	2.893	0
FES1	Q59NN8	Hsp70 nucleotide exchange factor		2.5382	0	0	0	0	0	0	0	0	0	0	0	0	0	1.2864	0	0	0
SNZ1	Q5AIA6	Pyridoxine biosynthesis protein		2.5299	3.3951	6.8894	0	0	0	0	0	0	0	0	0	0	0	2.5728	2.5746	2.893	0
RSP5	Q59Y21	E3 ubiquitin-protein ligase		2.5235	3.3951	0	2.3369	2.5673	4.9041	3.0747	2.2563	0	2.9826	4.0865	0	0	0	2.5728	0	2.893	0
PGA31	A0A1D8PM04	Cell wall protein		2.5219	3.3951	0	0	0	0	0	4.5126	4.0196	0	2.0433	3.847	0	0	0	0	2.893	5.9851
SAP99	A0A1D8PGZ9			2.508	10.185	0	23.369	7.7018	0	24.598	27.075	8.0392	14.913	6.1298	0	0	30.639	0	2.5746	0	0
CDC10	P39827	Cell division control protein		2.5022	0	0	0	0	0	0	6.7689	0	2.9826	2.0433	0	0	2.1885	5.1456	0	0	0
LEU42	A0A1D8PIF8			2.5016	0	0	0	0	0	0	0	0	0	0	0	0	0	2.5728	0	0	0
MNN2	Q59WF4	Alpha-1,2-mannosyltransferase		2.4692	3.3951	0	9.3476	0	0	3.0747	0	0	0	0	0	0	0	0	5.1493	2.893	0
IFF11	Q5A7R7	Cell wall protein		2.4572	13.58	0	4.6738	0	0	0	0	0	0	0	0	0	0	5.1456	5.1493	17.358	0
PMI1	P34948	Mannose-6-phosphate isomerase		2.4393	0	0	0	0	0	0	0	0	0	0	0	0	0	0	0	0	0
BMT8	Q5AHD6	Beta-mannosyltransferase		2.4249	6.7902	0	2.3369	2.5673	0	6.1494	0	0	0	0	0	0	0	1.2864	2.5746	2.893	0
RPL9B	Q5AEN2	Ribosomal 60S subunit protein L9B		2.4077	3.3951	3.4447	2.3369	2.5673	9.8081	3.0747	2.2563	0	0	4.0865	0	0	4.377	2.5728	2.5746	2.893	0
orf19.4830	Q5APD5	Uncharacterized protein		2.3832	3.3951	0	2.3369	2.5673	0	0	4.5126	0	2.9826	0	0	0	2.1885	1.2864	2.5746	2.893	0
LYS1	A0A1D8PMA1	Saccharopine dehydrogenase		2.3821	0	0	0	0	0	0	0	0	0	0	0	0	2.1885	2.5728	0	0	0
orf19.4382	Q5A006	Coatomer subunit zeta		2.366	0	0	0	0	0	0	0	0	0	0	0	0	0	1.2864	0	0	0
LYS22	Q59TC4			2.337	0	0	0	0	0	0	0	0	0	0	0	0	0	0	0	0	0
RHD3	Q5A5U4	Cell wall protein		2.3114	6.7902	0	11.685	2.5673	0	0	0	0	0	4.0865	0	0	2.1885	0	7.7239	0	0
orf19.6553	A0A1D8PQW4	Domain-containing protein		2.2649	6.7902	6.8894	4.6738	0	0	12.299	9.0252	8.0392	23.861	4.0865	3.847	0	10.943	3.8592	7.7239	11.572	0
MNN12	Q5APQ8	Putative alpha-1,3-mannosyltransferase		2.2649	13.58	3.4447	0	0	0	0	0	0	0	0	0	0	0	2.5728	5.1493	8.6791	0
LPD1	Q59RQ6	Dihydrolipoyl dehydrogenase		2.2527	3.3951	10.334	21.032	2.5673	4.9041	9.2241	4.5126	4.0196	2.9826	2.0433	7.6941	0	6.5655	3.8592	10.299	11.572	0
SAC6	A0A1D8PPY8	Fimbrin		2.2477	3.3951	3.4447	0	0	0	0	0	0	0	0	0	0	0	2.5728	0	2.893	0
POL30	Q5AMN0	Proliferating cell nuclear antigen		2.2426	3.3951	6.8894	0	0	0	0	4.5126	0	0	2.0433	0	0	2.1885	3.8592	5.1493	5.7861	0
PGA63	Q5AAU3	Protein transport protein		2.2426	0	0	0	0	0	0	0	0	0	0	0	0	0	2.5728	0	0	0
LDG3	A0A1D8PR06			2.2254	0	0	0	0	0	0	0	0	0	2.0433	3.847	0	2.1885	2.5728	2.5746	0	0
ATP1	A0A1D8PDC4	ATP synthase subunit alpha		2.206	3.3951	0	7.0107	2.5673	0	0	2.2563	0	0	0	0	0	6.5655	6.432	2.5746	2.893	0
LYS9	A0A1D8PKJ4	Saccharopine dehydrogenase		2.1949	0	0	0	0	0	0	0	0	0	0	0	0	0	0	0	0	0
PFK2	Q5AGZ8	ATP-dependent 6-phosphofructokinase		2.1869	0	0	0	0	0	0	0	0	0	0	0	0	0	3.8592	0	0	0
RHO3	A0A1D8PH96	Rho family GTPase		2.1823	23.766	13.779	11.685	10.269	14.712	12.299	27.075	28.137	32.809	10.216	26.929	35.534	28.451	2.5728	7.7239	0	0
ANB1	O94083	Eukaryotic translation initiation factor 5A		2.1784	6.7902	0	2.3369	2.5673	0	0	0	0	2.9826	0	0	0	2.1885	1.2864	0	0	0
orf19.836.1	A0A1D8PH20	Small nuclear ribonucleoprotein G		2.1406	6.7902	0	0	0	0	0	0	0	0	0	0	0	0	1.2864	5.1493	5.7861	0
MPG1	O93827	Mannose-1-phosphate guanyltransferase		2.1406	0	0	0	0	0	0	0	0	0	0	0	0	2.1885	0	0	0	0
GRE3	A0A1D8PNK3	Aldehyde/xylose reductase		2.1243	3.3951	0	7.0107	0	0	0	2.2563	4.0196	0	2.0433	0	0	2.1885	1.2864	5.1493	0	0
PRE9	Q5AEB8	Proteasome endopeptidase complex		2.1103	3.3951	0	14.021	2.5673	19.616	6.1494	20.307	8.0392	8.9478	14.303	15.388	5.0763	10.943	3.8592	5.1493	8.6791	0
RPS3	A0A1D8PSV5	Ribosomal 40S subunit protein S3		2.1014	0	0	0	0	0	0	0	0	0	0	0	0	2.1885	1.2864	0	0	0
HSM3	Q59PP0	DNA mismatch repair protein		2.0942	0	0	0	0	0	0	0	0	0	0	0	0	0	1.2864	0	0	0
PRO2	Q5ADR2	Glutamate-5-semialdehyde dehydrogenase		2.0776	0	0	0	0	0	0	0	0	0	0	0	0	0	3.8592	0	0	0
ACH1	P83773	Acetyl-CoA hydrolase		2.0521	0	0	0	0	0	0	0	0	0	0	0	0	2.1885	1.2864	0	0	0
EMP24	Q59V63			2.0506	0	0	9.3476	0	0	3.0747	0	4.0196	2.9826	4.0865	11.541	0	2.1885	2.5728	2.5746	8.6791	0
orf19.2769	Q5AF37	Inhibitor I9 domain-containing protein		2.0345	6.7902	3.4447	2.3369	0	0	0	0	0	0	0	0	0	0	0	2.5746	0	0
HCH1	A0A1D8PPR5			2.0281	6.7902	0	4.6738	0	0	0	2.2563	0	0	2.0433	3.847	0	2.1885	0	7.7239	5.7861	0
orf19.2168.3	A0A1D8PI76			2.0173	0	0	0	2.5673	0	0	4.5126	4.0196	0	0	0	0	6.5655	1.2864	0	0	0
SBA1	A0A1D8PQ94	Chaperone		2.0173	0	0	0	0	0	0	2.2563	0	0	2.0433	7.6941	0	4.377	1.2864	0	0	0
orf19.2269	A0A1D8PHU6	Putative phosphoric monoester hydrolase		2.0173	0	0	0	0	0	0	0	0	0	0	0	0	0	1.2864	0	0	0
ATP7	Q59PV8	ATP synthase subunit d, mitochondrial		2.0125	3.3951	3.4447	0	5.1345	4.9041	0	6.7689	0	2.9826	0	3.847	0	6.5655	5.1456	2.5746	2.893	0
LIP1	A0A1D8PER6			2.0112	3.3951	0	2.3369	0	0	3.0747	0	0	2.9826	0	0	0	0	1.2864	5.1493	2.893	0
QCR2	P83782	Cytochrome b-c1 complex subunit 2, mitochondrial		2.0054	20.371	13.779	14.021	2.5673	4.9041	3.0747	9.0252	4.0196	8.9478	0	3.847	0	6.5655	3.8592	23.172	40.502	0
SER2	Q5A0H3	Phosphoserine phosphatase		1.9935	0	0	0	0	0	0	0	0	0	0	0	0	0	1.2864	0	0	0
orf19.5553	A0A1D8PPZ9	L-methionine (R)-S-oxide reductase		1.9856	0	0	0	0	0	0	0	0	0	0	0	0	0	0	0	0	0
DOA1	A0A1D8PEM3			1.9695	0	0	2.3369	0	0	0	0	0	0	0	0	0	0	0	0	0	0
orf19.3219	A0A1D8PNT7	Metallophos domain-containing protein		1.9356	20.371	0	9.3476	5.1345	0	3.0747	2.2563	4.0196	8.9478	12.26	3.847	0	4.377	1.2864	12.873	8.6791	5.9851
SEC23	Q5A455	Protein transport protein SEC23		1.9082	0	0	4.6738	0	0	0	4.5126	4.0196	5.9652	4.0865	3.847	0	4.377	2.5728	2.5746	0	0
TIF45	Q9P975	Eukaryotic translation initiation factor		1.8971	0	0	0	0	0	0	0	0	0	0	0	0	0	1.2864	0	0	0
BNA1	Q59K86	3-hydroxyanthranilate 3,4-dioxygenase		1.895	3.3951	0	0	0	0	0	0	0	0	0	0	0	0	2.5728	2.5746	0	0
orf19.7196	A0A1D8PRH0	Proteinase B		1.8907	37.346	20.668	14.021	12.836	9.8081	15.374	18.05	16.078	11.93	18.389	23.082	10.153	10.943	1.2864	36.045	17.358	5.9851
DFG5	Q5ACZ2	Mannan endo-1,6-alpha-mannosidase		1.8835	0	0	4.6738	0	0	0	2.2563	0	0	0	0	0	0	1.2864	7.7239	5.7861	0
FTR1	A0A1D8PFV0	High-affinity iron permease		1.8784	0	0	16.358	10.269	19.616	0	15.794	12.059	5.9652	2.0433	15.388	0	17.508	2.5728	0	0	0
PRE4	A0A1D8PNC8	Proteasome subunit beta		1.8716	3.3951	6.8894	23.369	2.5673	14.712	12.299	9.0252	0	2.9826	14.303	7.6941	0	6.5655	3.8592	5.1493	14.465	0
OSM1	Q59T35	Fumarate reductase		1.8577	0	0	0	0	0	0	0	0	0	0	0	0	0	1.2864	0	0	0
orf19.3319	Q5A915	Uncharacterized protein		1.8418	0	0	0	0	0	0	0	0	0	0	0	0	0	1.2864	0	0	0
COR1	A0A1D8PP59	Ubiquinol--cytochrome-c reductase		1.8404	10.185	6.8894	16.358	0	4.9041	0	2.2563	0	0	0	0	0	2.1885	0	10.299	40.502	0
PUP2	Q59PZ1	Proteasome endopeptidase complex		1.8367	6.7902	3.4447	21.032	2.5673	9.8081	9.2241	20.307	12.059	8.9478	6.1298	3.847	0	8.754	0	5.1493	5.7861	0
RAC1	A0A1D8PDV5	Rho family GTPase		1.7969	16.976	3.4447	4.6738	2.5673	9.8081	3.0747	0	0	11.93	2.0433	0	0	6.5655	1.2864	5.1493	0	0
orf19.2426	Q5A1X9	HD domain-containing protein		1.7969	0	0	0	0	0	0	0	0	0	0	0	0	0	0	0	0	0
SEC13	Q5AEF2	Protein transport protein		1.7732	0	0	0	0	0	0	0	0	0	0	0	0	0	2.5728	0	0	0
orf19.3475	A0A1D8PPV6	Uncharacterized protein		1.7686	10.185	6.8894	9.3476	12.836	29.424	3.0747	24.819	24.118	0	4.0865	11.541	0	8.754	0	5.1493	2.893	0
SEC24	Q5AQ76	Protein transport protein		1.7634	0	0	0	0	0	0	0	0	0	0	0	0	0	1.2864	0	0	0
SOD4	Q5AD05	Cell surface superoxide dismutase		1.7505	3.3951	3.4447	2.3369	2.5673	4.9041	3.0747	0	4.0196	2.9826	0	3.847	5.0763	4.377	3.8592	2.5746	0	0
PYC2	A0A1D8PLY4	Pyruvate carboxylase		1.7332	0	0	0	0	0	0	0	0	0	0	0	0	2.1885	0	0	0	0
orf19.716	A0A1D8PTA6	Uncharacterized protein		1.7299	3.3951	6.8894	14.021	0	0	6.1494	9.0252	0	2.9826	0	0	0	2.1885	1.2864	7.7239	8.6791	0
orf19.6200	Q5AB49	Probable pathogenesis-related protein		1.718	0	0	0	0	0	0	0	0	0	0	0	0	0	5.1456	0	0	0
SOD2	Q5A8Z4	Superoxide dismutase		1.7106	0	0	0	0	0	0	0	0	0	0	0	0	2.1885	1.2864	0	2.893	0
TMA19	Q5A860	Translationally-controlled tumor protein		1.7038	3.3951	3.4447	2.3369	2.5673	4.9041	0	4.5126	4.0196	0	2.0433	3.847	0	4.377	1.2864	2.5746	2.893	5.9851
PRX1	Q5A5A0	Thioredoxin peroxidase		1.6962	3.3951	0	2.3369	0	0	0	2.2563	0	2.9826	2.0433	0	0	2.1885	1.2864	2.5746	2.893	0
orf19.1338	A0A1D8PRB4	Uncharacterized protein		1.6915	0	0	0	0	0	0	0	0	0	0	0	0	0	2.5728	0	0	0
FRP3	A0A1D8PHP8	Putative ammonium permease		1.6897	3.3951	10.334	4.6738	2.5673	9.8081	0	11.281	8.0392	2.9826	2.0433	11.541	0	8.754	0	10.299	5.7861	0
SEC4	P0CY31	Ras-related protein		1.6897	20.371	6.8894	2.3369	0	0	0	4.5126	4.0196	11.93	2.0433	3.847	5.0763	8.754	0	0	0	0
AGM1	Q5AKW4	Phosphoacetylglucosamine mutase		1.6388	0	0	0	0	0	0	0	0	0	0	0	0	0	1.2864	0	0	0
orf19.4150	Q59NQ2	Glutathione-disulfide reductase		1.6369	3.3951	3.4447	2.3369	0	0	0	0	0	0	0	0	0	0	0	7.7239	2.893	0
orf19.1769	A0A1D8PIN9	Phosducin domain-containing protein		1.6369	0	0	0	0	0	0	0	0	0	0	0	0	0	1.2864	2.5746	2.893	0
MTS1	Q5APD4	Sphingolipid C9-methyltransferase		1.6271	0	0	0	0	0	0	4.5126	0	0	0	0	0	0	2.5728	0	11.572	0
orf19.7086	A0A1D8PQJ7	Importin		1.6249	0	0	0	0	0	0	0	0	0	0	0	0	0	0	0	0	0
RGI1	Q59KG2	Respiratory growth induced protein		1.615	16.976	3.4447	0	0	0	3.0747	9.0252	8.0392	5.9652	0	3.847	5.0763	4.377	0	0	0	0
ARF3	A0A1D8PJ64			1.5959	27.161	6.8894	4.6738	0	0	6.1494	6.7689	8.0392	44.739	0	7.6941	5.0763	17.508	0	0	0	0
SFC1	A0A1D8PNY6			1.5782	0	0	0	0	0	0	2.2563	0	0	0	7.6941	0	2.1885	6.432	0	5.7861	0
HHF1	Q59VN4	Histone H4		1.575	10.185	3.4447	2.3369	7.7018	9.8081	0	13.538	0	2.9826	2.0433	3.847	0	10.943	1.2864	0	5.7861	0
PRE2	Q59Z65	Proteasome core particle subunit beta 5		1.5714	10.185	10.334	7.0107	7.7018	9.8081	9.2241	11.281	12.059	2.9826	8.1731	15.388	0	6.5655	3.8592	5.1493	8.6791	0
PRE5	A0A1D8PRH6	Proteasome endopeptidase complex		1.5663	3.3951	10.334	9.3476	5.1345	19.616	12.299	20.307	12.059	2.9826	16.346	11.541	0	24.074	3.8592	5.1493	5.7861	0
orf19.4886	Q5AP78	Uncharacterized protein		1.5663	0	0	7.0107	5.1345	0	3.0747	0	4.0196	0	8.1731	3.847	0	6.5655	1.2864	0	2.893	0
orf19.4395	A0A1D8PSI3	Domain-containing protein		1.5553	0	0	0	0	0	0	2.2563	0	0	2.0433	0	0	2.1885	2.5728	0	0	0
orf19.6990	A0A1D8PKA6	Peptidyl-prolyl cis-trans isomerase		1.5442	0	0	0	0	0	0	0	0	0	0	0	0	0	1.2864	0	0	0
NCE102	Q5ANE3	Non-classical export protein		1.543	6.7902	0	2.3369	2.5673	4.9041	0	4.5126	8.0392	11.93	0	7.6941	5.0763	6.5655	1.2864	5.1493	0	0
orf19.7297	A0A1D8PTV7	Putative cystathionine beta-lyase		1.5308	0	0	0	0	0	0	0	0	0	0	0	0	0	0	0	0	0
SUI1	Q59LQ6	Translation initiation factor		1.5269	0	0	0	0	0	0	0	0	0	0	0	0	0	1.2864	0	0	0
GCD11	Q5AGF6	Translation initiation factor		1.5265	0	0	0	0	0	0	0	0	0	0	0	0	0	3.8592	0	0	0
orf19.1564	A0A1D8PGL1	Bap31 domain-containing protein		1.5201	6.7902	3.4447	0	2.5673	0	0	2.2563	0	2.9826	0	0	0	2.1885	1.2864	0	2.893	0
RSR1	A0A1D8PS50	Ras family GTPase		1.5201	16.976	6.8894	7.0107	0	4.9041	6.1494	9.0252	8.0392	14.913	6.1298	11.541	5.0763	17.508	0	5.1493	0	0
SOL3	Q59PZ6	6-phosphogluconolactonase-like protein		1.5154	0	0	0	0	0	0	0	0	0	0	0	0	0	3.8592	0	0	0
DAG7	Q5AMF9			1.5136	0	0	0	0	0	0	2.2563	4.0196	0	0	0	0	2.1885	0	0	0	0
GGA2	A0A1D8PCX6	Phosphatidylinositol 4-P-binding protein		1.5082	3.3951	0	0	2.5673	0	3.0747	0	0	2.9826	0	0	0	2.1885	2.5728	2.5746	2.893	0
EGD2	Q5ANP2	Nascent polypeptide-associated complex		1.5025	0	0	0	0	0	0	0	0	0	0	0	0	0	0	0	2.893	0
IDH1	A0A1D8PEM5	Isocitrate dehydrogenase [NAD], mitochondrial		1.5013	0	0	7.0107	2.5673	4.9041	6.1494	4.5126	0	0	4.0865	3.847	0	4.377	1.2864	2.5746	2.893	0
GDA1	Q8TGH6	Guanosine-diphosphatase		1.501	6.7902	6.8894	4.6738	0	0	0	0	0	0	0	0	0	2.1885	0	0	0	0
LKH1	Q59NB8	Leucine aminopeptidase		1.4917	0	0	0	0	0	0	0	0	0	0	0	0	2.1885	1.2864	0	0	0
RPS9B	A0A1D8PGY8	Ribosomal 40S subunit protein S9B		1.4834	0	0	0	0	0	0	0	0	0	0	0	0	0	1.2864	2.5746	0	0
CDC3	A0A1D8PD83	Septin		1.4834	0	0	0	0	0	0	0	0	0	0	3.847	0	4.377	0	0	0	0
SHO1	Q5AQ36	High osmolarity signaling protein		1.4661	0	0	4.6738	0	0	0	0	0	0	0	0	0	0	0	0	0	0
ADE1	A0A1D8PRQ1	SAICAR synthase		1.4597	0	0	0	0	0	0	0	0	0	0	0	0	0	0	0	0	0
TPS1	Q92410	Alpha,alpha-trehalose-phosphate synthase		1.4197	0	0	0	0	0	0	0	0	0	0	0	0	0	3.8592	0	0	0
AAT21	Q59N40	Aspartate aminotransferase		1.4076	0	0	2.3369	0	0	0	0	0	0	0	0	0	0	2.5728	0	0	0
ECM4	A0A1D8PS56	Omega-class glutathione transferase		1.3913	0	0	0	0	0	0	0	0	0	0	0	0	0	2.5728	0	0	0
orf19.1355	Q59YH1	Glucosamine_iso domain-containing protein		1.3895	0	0	0	0	0	0	2.2563	0	0	2.0433	0	0	0	2.5728	0	0	0
orf19.2484	Q5AA00	Peptide hydrolase		1.3794	0	0	2.3369	2.5673	0	3.0747	4.5126	4.0196	8.9478	4.0865	0	0	4.377	1.2864	5.1493	2.893	0
RPS4A	Q5A5Q8	40S ribosomal protein S4		1.3619	3.3951	0	0	0	0	3.0747	2.2563	0	2.9826	0	0	0	2.1885	1.2864	0	0	0
ILV5	A0A1D8PPG7	Ketol-acid reductoisomerase, mitochondrial		1.3601	3.3951	10.334	0	0	0	0	2.2563	0	0	0	0	0	2.1885	0	2.5746	5.7861	0
RPL18	A0A1D8PK43	Ribosomal 60S subunit protein L18A		1.3601	3.3951	3.4447	0	0	0	0	0	0	0	2.0433	0	0	2.1885	1.2864	2.5746	2.893	0
BAT22	A0A1D8PKB9	Branched-chain-amino-acid aminotransferase		1.3601	0	0	0	0	0	0	2.2563	0	2.9826	0	0	0	0	0	7.7239	0	0
RPS16A	A0A1D8PCW6	Ribosomal 40S subunit protein S16A		1.3601	0	0	0	0	0	0	0	0	0	0	0	0	2.1885	0	0	0	0
orf19.1409.1	A0A1D8PM41	Ribosomal 60S subunit protein L22B		1.3543	3.3951	0	0	0	0	0	2.2563	0	2.9826	2.0433	0	0	4.377	1.2864	2.5746	2.893	0
SCL1	A0A1D8PJ20	Proteasome endopeptidase complex		1.346	6.7902	6.8894	25.706	5.1345	34.328	12.299	24.819	28.137	2.9826	10.216	15.388	0	4.377	3.8592	2.5746	8.6791	5.9851
BUD7	Q59N76	Exomer complex subunit		1.3432	3.3951	0	0	0	0	0	0	0	0	2.0433	0	0	0	2.5728	0	0	0
HGT6	Q5AD47	Hexose transporter		1.3413	13.58	10.334	7.0107	2.5673	9.8081	6.1494	18.05	12.059	17.896	2.0433	19.235	5.0763	17.508	2.5728	10.299	8.6791	5.9851
ZRT1	A0A1D8PMR6			1.3234	6.7902	3.4447	2.3369	0	0	0	2.2563	0	2.9826	2.0433	7.6941	0	0	1.2864	5.1493	2.893	0
HAM1	Q59N80	Inosine triphosphate pyrophosphatase		1.3234	0	0	0	0	0	0	0	0	0	0	0	0	0	0	0	0	0
orf19.4532	A0A1D8PCL4	Uncharacterized protein		1.3234	0	0	0	0	0	0	0	0	0	0	0	0	0	1.2864	0	0	0
ARL1	Q5AMP3	Arf family GTPase		1.3176	3.3951	3.4447	0	0	0	0	0	0	2.9826	0	0	0	0	1.2864	2.5746	2.893	0
LTP1	A0A1D8PE91	Tyrosine protein phosphatase		1.2843	0	0	0	0	0	0	0	0	0	0	0	0	0	0	0	0	0
SKP1	Q59WE2	SCF ubiquitin ligase subunit		1.2476	0	0	0	0	0	0	0	0	0	0	0	0	0	0	2.5746	2.893	0
HSP104	A0A1D8PTP9	Chaperone ATPase		1.2065	0	0	0	0	0	0	0	0	0	0	0	0	0	0	0	2.893	0
YIM1	Q5AHE9			1.2011	0	0	0	0	0	0	0	0	0	0	0	0	0	2.5728	0	0	0
orf19.5917.3	A0A1D8PK11	RNA-binding protein		1.1961	0	0	0	0	0	0	0	0	0	0	0	0	0	1.2864	0	0	0
PRE3	A0A1D8PK85	Proteasome core particle subunit beta 1		1.1943	6.7902	10.334	14.021	5.1345	14.712	9.2241	20.307	20.098	2.9826	6.1298	15.388	0	19.697	3.8592	5.1493	11.572	0
SFH5	Q5AP66	Phosphatidylinositol transfer protein		1.1943	0	0	0	0	0	0	2.2563	0	0	0	0	0	2.1885	1.2864	0	0	0
KRE5	A0A1D8PJN6			1.1925	0	0	0	0	0	0	0	0	0	0	0	0	0	1.2864	0	0	0
RNY1-B	Q5AKB1	Ribonuclease T2-like 1-B		1.189	13.58	10.334	11.685	5.1345	0	9.2241	9.0252	0	14.913	8.1731	7.6941	10.153	6.5655	1.2864	20.597	17.358	0
GAP4	Q59WB3	S-adenosylmethionine permease		1.1878	6.7902	6.8894	14.021	10.269	29.424	3.0747	20.307	8.0392	11.93	10.216	7.6941	0	10.943	2.5728	18.022	8.6791	0
ARO2	A0A1D8PTK1	Chorismate synthase		1.1717	0	0	2.3369	0	0	0	2.2563	0	0	0	0	0	0	0	0	0	0
RPL5	Q5AGZ7	Ribosomal 60S subunit protein L5		1.1699	0	0	0	0	0	0	0	0	0	0	0	0	0	0	0	2.893	0
DFI1	Q5AFI4	Cell-surface associated glycoprotein		1.1699	3.3951	3.4447	2.3369	2.5673	4.9041	0	4.5126	0	2.9826	0	0	0	6.5655	1.2864	2.5746	0	0
orf19.6264.3	A0A1D8PDT9	PRA1 family protein		1.1699	0	0	0	0	0	0	0	0	0	0	0	0	0	0	0	0	0
SUB2	A0A1D8PKZ3	ATP-dependent RNA helicase		1.1634	0	0	0	0	0	0	0	0	0	0	0	0	0	1.2864	0	0	0
orf19.6559	A0A1D8PQW6	Transcription factor TFIIIC subunit		1.1545	0	0	0	0	0	0	0	0	0	0	0	0	0	1.2864	0	0	0
AAT1	A0A1D8PHC9	Aspartate transaminase		1.1512	0	3.4447	2.3369	0	0	0	0	0	0	0	0	0	0	2.5728	0	0	0
DUT1	P0CY19	Deoxyuridine 5'-triphosphate nucleotidohydrolase		1.1508	0	0	0	0	0	0	0	0	0	2.0433	0	0	0	0	2.5746	0	0
CSP37	Q5A9D4			1.1415	10.185	6.8894	2.3369	5.1345	9.8081	6.1494	11.281	4.0196	2.9826	6.1298	3.847	0	13.131	0	5.1493	2.893	0
orf19.1862	Q59U89	SBDS domain-containing protein		1.1415	10.185	0	0	0	0	0	0	0	0	0	0	0	0	0	2.5746	0	0
RPS7A	Q5AJ93	40S ribosomal protein S7		1.1415	0	0	0	0	4.9041	0	0	0	0	0	0	0	0	0	0	0	0
SDH12	Q5A1E8	Succinate dehydrogenase, mitochondrial		1.1307	0	0	0	0	0	0	0	0	0	0	0	0	0	1.2864	0	5.7861	0
GLO3	Q5A7M1	ADP-ribosylation factor		1.1224	0	0	0	0	0	0	0	0	0	0	0	0	0	0	0	0	0
ARD	A0A1D8PPB1			1.1095	0	0	0	0	0	0	0	0	0	0	0	0	0	2.5728	0	0	0
APT1	Q5ALX8	Adenine phosphoribosyltransferase		1.0941	3.3951	0	0	0	0	0	0	0	0	0	0	0	0	0	0	0	0
orf19.7306	A0A1D8PTW9	Pyridoxine 4-dehydrogenase		1.071	0	0	0	0	0	0	0	0	0	0	0	0	0	2.5728	0	0	0
orf19.3594	Q59Y55	Uncharacterized protein		1.0484	0	0	0	0	0	0	0	0	0	0	0	0	0	1.2864	2.5746	0	0
CYC1	P53698	Cytochrome c		1.0476	0	0	0	0	0	0	0	0	0	0	3.847	0	0	1.2864	2.5746	2.893	0
SAP7	Q59VH7	Candidapepsin-7		1.0358	0	0	0	0	0	0	0	0	0	0	0	0	0	2.5728	0	0	0
orf19.715	A0A1D8PT83	Uncharacterized protein		1.0325	3.3951	0	14.021	5.1345	4.9041	9.2241	13.538	4.0196	2.9826	8.1731	3.847	0	4.377	0	7.7239	14.465	0
PRE10	A0A1D8PQW1	Proteasome endopeptidase complex		1.0274	6.7902	10.334	16.358	2.5673	14.712	12.299	11.281	4.0196	5.9652	8.1731	7.6941	0	8.754	1.2864	7.7239	14.465	0
orf19.100	A0A1D8PPI4	Lipase_3 domain-containing protein		1.0182	3.3951	3.4447	2.3369	2.5673	0	3.0747	0	0	0	0	0	0	2.1885	0	7.7239	5.7861	0
orf19.6872	Q59T45	Putative amidotransferase		1.0164	3.3951	0	0	0	0	0	0	0	0	0	0	0	0	0	0	0	0
orf19.1480	Q5ALU6	Uncharacterized protein		1.0164	0	0	0	0	0	0	0	0	0	0	0	0	0	0	0	0	0
MTR10	A0A1D8PNS3			1.0009	0	0	0	0	0	0	0	0	0	0	0	0	0	0	0	0	0
CPY1	A0A1D8PRC2	Carboxypeptidase		0.9991	23.766	27.558	46.738	20.538	0	18.448	15.794	20.098	32.809	16.346	38.47	10.153	19.697	0	48.918	40.502	5.9851
EMP70	Q5AF62	Transmembrane 9 superfamily member		0.9973	0	0	0	0	0	0	0	0	0	0	0	0	0	1.2864	0	5.7861	0
YPT31	A0A1D8PTI2	Rab family GTPase		0.9926	6.7902	0	0	2.5673	0	3.0747	2.2563	4.0196	8.9478	4.0865	3.847	0	6.5655	2.5728	2.5746	5.7861	0
ACC1	A0A1D8PRR7	Acetyl-CoA carboxylase		0.9926	0	0	0	0	0	0	0	0	0	0	0	5.0763	0	1.2864	0	2.893	0
NTF2	A0A1D8PES3	Ran GTPase-binding protein		0.988	0	0	0	0	0	0	0	0	0	0	0	0	0	0	0	0	0
orf19.1049	Q59VP4	Nudix hydrolase domain-containing protein		0.9707	0	0	0	0	0	0	0	0	0	0	0	0	0	1.2864	0	0	0
GPX2	Q59WW8	Glutathione peroxidase		0.9693	6.7902	3.4447	0	0	4.9041	0	4.5126	0	17.896	2.0433	7.6941	0	10.943	1.2864	5.1493	0	0
VPS27	Q5ABD9	Vacuolar protein sorting-associated protein 27		0.9689	0	0	0	0	0	0	0	0	0	0	0	0	0	0	0	0	0
orf19.2478.1	A0A1D8PDL6	Ribosomal 60S subunit protein L7A		0.9624	0	0	0	0	0	0	0	0	0	0	0	0	0	1.2864	0	0	0
HTB2	Q59VP1	Histone		0.9365	0	0	0	0	4.9041	0	4.5126	4.0196	2.9826	0	0	5.0763	2.1885	0	0	0	5.9851
orf19.4627	A0A1D8PLF7	Uncharacterized protein		0.893	0	0	0	0	0	0	0	0	0	0	0	0	0	0	0	0	0
CDR11	A0A1D8PK15			0.8876	6.7902	6.8894	4.6738	2.5673	0	0	11.281	8.0392	11.93	4.0865	0	0	0	1.2864	7.7239	2.893	0
ECM331	Q5AGC4	Cell surface GPI-anchored protein		0.8808	0	3.4447	2.3369	0	0	0	4.5126	4.0196	0	2.0433	0	0	2.1885	0	5.1493	0	0
ADE12	P0CH96	Adenylosuccinate synthetase		0.8808	0	0	0	0	0	0	0	0	0	0	0	0	0	1.2864	0	0	0
orf19.5682	A0A1D8PMU8	Importin subunit alpha		0.8808	0	0	0	0	0	0	0	0	0	0	0	0	0	3.8592	0	0	0
YCP4	A0A1D8PT03	Flavodoxin-like fold family protein		0.8524	3.3951	6.8894	0	7.7018	14.712	0	6.7689	4.0196	5.9652	2.0433	3.847	0	8.754	0	0	0	0
YRB1	A0A1D8PRQ3	Ran GTPase-binding protein		0.8456	0	0	0	0	0	0	0	0	0	0	0	0	0	0	0	0	0
HGT2	Q59VZ0			0.8409	0	0	0	0	0	0	4.5126	0	0	0	7.6941	0	0	0	5.1493	0	0
MDH1	P83778	Malate dehydrogenase, cytoplasmic		0.8409	0	0	0	5.1345	0	0	0	0	0	0	0	0	0	1.2864	0	0	0
ARO9	A0A1D8PMC5	Aromatic-amino-acid:2-oxoglutarate transaminase		0.8391	0	0	0	0	0	0	0	0	0	0	0	0	0	0	0	0	0
SER33	Q5A3K7	D-3-phosphoglycerate dehydrogenase		0.8391	0	0	0	0	0	0	0	0	0	0	0	0	0	1.2864	0	0	0
ADK1	Q5A4Q1	Adenylate kinase		0.828	0	0	0	0	0	0	0	0	0	0	0	0	0	1.2864	0	2.893	0
TRP4	A0A1D8PMR2	Anthranilate phosphoribosyltransferase		0.828	0	0	0	0	0	0	0	0	0	0	0	0	0	0	0	0	0
SAP3	P0CY29	Candidapepsin-3		0.8172	0	0	4.6738	0	0	3.0747	2.2563	0	0	0	0	0	2.1885	2.5728	0	0	0
orf19.6701	Q59R20	Proline--tRNA ligase		0.8172	0	0	0	0	0	0	0	0	0	0	0	0	0	1.2864	0	0	0
LSC2	A0A1D8PTB5	Succinate--CoA ligase, mitochondrial		0.8107	0	0	0	0	0	0	2.2563	0	0	0	0	0	0	1.2864	0	0	0
orf19.1514	A0A1D8PGG5	Uncharacterized protein		0.8107	0	0	0	0	0	0	0	0	0	0	0	0	0	1.2864	0	0	0
DIP5	A0A1D8PCR4			0.8093	0	0	2.3369	0	0	0	0	0	5.9652	0	0	0	2.1885	1.2864	15.448	2.893	0
ARO8	A0A1D8PG20	Bifunctional transaminase		0.8089	0	0	2.3369	0	0	0	2.2563	0	0	0	0	0	0	1.2864	0	0	0
RPL11	A0A1D8PHW1	Ribosomal 60S subunit protein L11B		0.8089	0	0	0	0	4.9041	0	0	0	0	0	0	0	0	1.2864	0	0	0
ADE5,7	A0A1D8PE67	Bifunctional ribotide synthase		0.8089	0	0	0	0	0	0	0	0	0	0	0	0	0	0	0	0	0
orf19.5834	A0A1D8PGN9	Importin		0.8089	0	0	0	0	0	0	0	0	0	0	0	0	0	0	0	0	0
orf19.4639	A0A1D8PLE6	Uncharacterized protein		0.8089	0	0	0	0	0	0	0	0	0	0	0	0	0	0	0	0	0
orf19.3932	Q5AK88	RRM domain-containing protein		0.7806	3.3951	0	2.3369	0	0	0	6.7689	0	0	2.0433	0	0	4.377	0	2.5746	0	0
ADO1	A0A1D8PQ26	Adenosine kinase		0.7806	0	0	0	0	0	0	0	0	0	0	0	0	0	1.2864	0	0	0
PHO112	A0A1D8PS71			0.7657	0	0	16.358	12.836	0	33.822	20.307	0	0	8.1731	15.388	0	21.885	0	0	2.893	0
ATP2	A0A1D8PKZ9	ATP synthase subunit beta		0.7607	0	0	0	0	0	0	0	0	0	0	0	0	0	0	0	0	0
MES1	A0A1D8PP21	Methionine--tRNA ligase		0.7341	0	0	0	0	0	0	0	0	0	0	0	0	0	1.2864	2.5746	0	0
BET2	A0A1D8PU24	Geranylgeranyl transferase		0.7341	0	0	0	0	0	0	0	0	0	0	0	0	0	1.2864	0	0	0
TPS3	A0A1D8PIS4	Trehalose 6-phosphate synthase		0.7341	0	0	0	0	0	0	0	0	0	0	0	0	0	1.2864	0	0	0
orf19.5925	Q5ANH8	Uncharacterized protein		0.7323	0	0	0	0	0	0	0	0	0	0	0	0	0	0	0	0	0
orf19.3378	A0A1D8PLV4	Uncharacterized protein		0.7291	6.7902	10.334	9.3476	10.269	0	12.299	6.7689	0	2.9826	20.433	7.6941	0	0	2.5728	5.1493	5.7861	0
HPT1	A0A1D8PGN7	Hypoxanthine phosphoribosyltransferase		0.7097	0	0	0	0	0	0	0	0	0	0	0	0	0	1.2864	0	0	0
orf19.1444	A0A1D8PGB7	Epsin		0.7028	0	0	0	0	0	0	0	0	0	0	0	0	0	0	0	0	0
COX5	Q5APK5	Cytochrome c oxidase subunit Va		0.6989	10.185	17.224	2.3369	0	4.9041	0	4.5126	0	0	0	0	0	0	1.2864	12.873	11.572	0
orf19.4246	A0A1D8PNE5	Uncharacterized protein		0.6924	0	0	0	0	0	0	0	0	0	0	0	0	0	2.5728	0	0	0
CAT2	Q5AMQ5	Carnitine O-acetyltransferase		0.6906	0	0	0	0	0	0	0	0	0	0	0	0	0	1.2864	0	2.893	0
BCY1	Q9HEW1	cAMP-dependent protein kinase		0.6906	0	0	0	0	0	0	0	0	0	0	0	0	0	0	0	0	0
RIB5	A0A1D8PP67	Riboflavin synthase		0.6906	0	0	0	0	0	0	0	0	0	0	0	0	0	2.5728	0	0	0
SAM4	A0A1D8PEB0	SAM-homocysteine S-methyltransferase		0.6874	0	0	0	0	0	0	0	0	0	0	0	0	0	0	0	0	0
ENT3	A0A1D8PGL6			0.6745	3.3951	3.4447	2.3369	2.5673	0	3.0747	0	0	0	4.0865	0	0	2.1885	0	2.5746	2.893	0
VMA4	A0A1D8PS38	H(+)-transporting V1 sector ATPase subunit E		0.6745	0	0	0	0	0	0	0	0	0	0	0	0	0	0	2.5746	2.893	0
HSP12	A0A1D8PNC7	Hsp12p		0.6745	27.161	6.8894	0	0	4.9041	0	2.2563	8.0392	8.9478	0	0	0	4.377	0	0	0	0
RPS21	Q5A900	Ribosomal 40S subunit protein S2		0.6745	3.3951	0	0	0	0	0	0	0	0	0	0	0	0	0	0	0	0
RPS19A	A0A1D8PK61	Ribosomal 40S subunit protein S19A		0.6745	0	0	0	0	0	0	0	0	0	0	0	0	0	0	0	0	0
orf19.2305	A0A1D8PF30	Tubulin-binding prefolding complex		0.6745	0	0	0	0	0	0	0	0	0	0	0	0	0	0	0	0	0
orf19.713	A0A1D8PT84	Uncharacterized protein		0.6745	0	0	0	0	0	0	0	0	0	0	0	0	0	0	0	0	0
MSI3	Q96VB9	Heat shock protein homolog		0.6622	0	0	0	0	0	0	0	0	0	0	0	0	0	0	0	0	0
RNR21	Q5A0L0	Ribonucleotide-diphosphate reductase		0.6622	0	0	0	0	0	0	0	0	0	0	0	0	0	1.2864	0	0	0
orf19.3335	Q5A8Z9	Uncharacterized protein		0.6572	3.3951	3.4447	4.6738	0	4.9041	0	4.5126	8.0392	5.9652	2.0433	3.847	0	4.377	0	0	8.6791	0
RPS1	P40910	40S ribosomal protein S1		0.6572	0	0	0	0	0	0	2.2563	0	0	0	0	0	2.1885	0	0	0	0
RPS23A	A0A1D8PDU3	Ribosomal 40S subunit protein S23B		0.6572	0	0	0	0	0	0	2.2563	0	0	0	0	0	0	1.2864	0	0	0
APE2	Q59KZ1	Aminopeptidase		0.6558	0	0	4.6738	0	0	0	13.538	0	0	0	0	0	4.377	0	5.1493	0	0
SLA2	A0A1D8PRF5			0.6558	0	0	0	0	0	0	0	0	0	0	0	0	0	1.2864	0	0	0
SGT2	Q5A0I8			0.6554	0	3.4447	2.3369	2.5673	0	3.0747	0	0	0	0	0	0	0	0	2.5746	0	0
COX1	P0C8K9	Cytochrome c oxidase		0.6554	0	3.4447	2.3369	0	0	0	0	0	0	0	0	0	0	0	2.5746	0	0
FMP45	A0A1D8PR25			0.6554	13.58	0	9.3476	5.1345	9.8081	3.0747	4.5126	4.0196	5.9652	0	3.847	0	6.5655	0	0	0	0
orf19.5614	A0A1D8PQ43	Ribonuclease H		0.6554	0	0	0	0	0	0	2.2563	0	0	0	0	0	0	0	0	0	0
CAP01	A0A1D8PRV7	F-actin-capping protein subunit alpha		0.6554	0	0	0	0	0	0	0	0	0	0	0	0	0	1.2864	0	0	0
GFA1	P53704	Glutamine--fructose-6-P aminotransferase		0.6554	0	0	0	0	0	0	0	0	0	0	0	0	0	0	0	0	0
MRI1	A0A1D8PGB1	Methylthioribose-1-phosphate isomerase		0.627	0	0	0	0	0	0	0	0	0	0	0	0	0	0	0	0	0
orf19.7531	A0A1D8PRL3	NAD(P)-bd_dom domain-containing protein		0.627	0	0	0	0	0	0	0	0	0	0	0	0	0	0	0	0	0
orf19.3341	A0A1D8PCI5	Arginine--tRNA ligase		0.6206	0	0	0	0	0	0	0	0	0	0	0	0	0	0	0	0	0
GLE2	A0A1D8PQE5	RNA export factor		0.6206	0	0	0	0	0	0	0	0	0	0	0	0	0	0	0	0	0
orf19.5620	A0A1D8PQ54	Uncharacterized protein		0.6206	0	0	0	0	0	0	0	0	0	0	0	0	0	1.2864	0	0	0
SSC1	P83784	Heat shock protein, mitochondrial		0.6141	0	0	0	0	0	0	2.2563	0	0	0	0	0	4.377	0	0	0	0
orf19.5799	Q5A0L2	Uncharacterized protein		0.5756	0	0	0	0	0	0	0	0	0	0	0	0	0	2.5728	0	0	0
PUP1	A0A1D8PU67	Proteasome core particle subunit beta 2		0.5439	0	0	4.6738	0	0	0	4.5126	4.0196	0	4.0865	7.6941	0	4.377	1.2864	2.5746	0	0
orf19.4127	A0A1D8PH89	SH3 domain-containing protein		0.5389	3.3951	0	4.6738	0	0	0	0	0	2.9826	2.0433	0	0	0	1.2864	2.5746	0	0
orf19.6079	A0A1D8PC75	Retrotrans_gag domain-containing protein		0.5389	0	0	2.3369	0	0	0	0	0	0	0	0	0	2.1885	0	0	0	0
ARC19	A0A1D8PRU4	Actin-related protein 2/3 complex subunit 4		0.5389	0	0	0	0	0	0	0	0	0	0	0	0	0	0	0	0	0
SGT1	A0A1D8PIG5	Co-chaperone		0.5389	0	0	0	0	0	0	0	0	0	0	0	0	0	1.2864	0	0	0
orf19.1085	A0A1D8PQD4	E2 ubiquitin-conjugating protein		0.5389	0	0	0	0	0	0	0	0	0	0	0	0	0	0	0	0	0
orf19.338	Q5AED0	Glyco_hydro_63 domain-containing protein		0.5389	0	0	0	0	0	0	0	0	0	0	0	0	0	0	0	0	0
CDC37	Q8X1E6	Hsp90 co-chaperone		0.5389	0	0	0	0	0	0	0	0	0	0	0	0	0	0	0	0	0
orf19.3016	A0A1D8PD02	Uncharacterized protein		0.5389	0	0	0	0	0	0	0	0	0	0	0	0	0	1.2864	0	0	0
orf19.1785	A0A1D8PIK6	PI31_Prot_C domain-containing protein		0.5339	0	0	0	0	0	0	0	0	0	0	0	0	0	0	0	0	0
orf19.4947	A0A1D8PFM0	DUF4149 domain-containing protein		0.5145	3.3951	3.4447	0	2.5673	0	0	0	0	0	0	0	0	0	0	2.5746	5.7861	0
HSP60	O74261	Heat shock protein		0.5087	10.185	10.334	2.3369	2.5673	0	0	0	0	0	2.0433	0	0	0	0	2.5746	8.6791	0
orf19.2047	Q5AD20	AMMECR1 domain-containing protein		0.5087	0	0	0	0	0	0	0	0	0	0	0	0	0	0	0	0	0
ADE17	Q5A6R2	Bifunctional cyclohydrolase		0.5087	0	0	0	0	0	0	0	0	0	0	0	0	0	1.2864	0	0	0
GPD2	Q59W33	Glycerol-3-phosphate dehydrogenase		0.5037	0	0	0	0	0	0	0	0	0	0	0	0	0	1.2864	0	0	0
SHM2	O13426	Serine hydroxymethyltransferase, cytosolic		0.5037	0	0	0	0	0	0	0	0	0	0	0	0	0	1.2864	0	0	0
PRC2	A0A1D8PN69	Carboxypeptidase		0.5022	13.58	10.334	4.6738	2.5673	0	6.1494	6.7689	4.0196	2.9826	4.0865	3.847	0	2.1885	0	10.299	8.6791	0
GAL10	A0A1D8PCN0	Bifunctional epimerase		0.5022	0	0	0	0	0	0	0	0	0	0	0	0	0	0	0	0	0
PUF3	A0A1D8PMA5	mRNA-binding protein		0.4972	0	0	0	0	0	0	0	0	0	2.0433	0	0	0	0	0	0	0
orf19.4633	Q5AML3	Oxidoreductase		0.4972	0	0	0	0	0	0	0	0	0	0	0	0	0	0	0	0	0
orf19.6487	Q5AH51	Uncharacterized protein		0.4972	0	0	0	0	0	0	0	0	0	0	0	0	0	0	0	0	0
SLP3	A0A1D8PTU3	PHB domain-containing protein		0.4954	0	0	4.6738	5.1345	0	0	2.2563	0	5.9652	0	3.847	0	2.1885	2.5728	2.5746	8.6791	0
PRE1	Q5AJZ5	Proteasome subunit beta		0.4954	3.3951	3.4447	2.3369	0	4.9041	3.0747	6.7689	12.059	0	6.1298	3.847	0	2.1885	0	2.5746	2.893	0
RPN2	Q5A3L0	26S proteasome regulatory subunit		0.4954	0	0	0	0	0	0	0	0	0	0	0	0	2.1885	0	0	0	0
SNF4	A0A1D8PQA6	AMP-activated serine/threonine-protein kinase		0.4954	0	0	0	0	0	0	0	0	0	0	0	0	0	0	0	0	0
ELF1	A0A1D8PTY4			0.4954	0	0	0	0	0	0	0	0	0	0	0	0	0	0	0	0	0
ATG27	Q5A5S7	Autophagy-related protein		0.467	6.7902	0	4.6738	0	0	0	2.2563	0	0	0	0	0	0	0	0	5.7861	0
DPS1-1	Q59UF7	Aspartate--tRNA ligase		0.467	0	0	0	0	0	0	2.2563	0	0	0	0	0	0	0	0	0	0
HSE1	Q5A895	Vacuolar protein-sorting machinery protein		0.467	0	0	0	0	0	0	0	0	0	0	0	0	0	0	0	0	0
CYS3	Q5A362	Cystathionine gamma-lyase		0.467	0	0	0	0	0	0	0	0	0	0	0	0	0	0	0	0	0
orf19.5665	A0A1D8PL15	D-arabinose 1-dehydrogenase		0.467	0	0	0	0	0	0	0	0	0	0	0	0	0	1.2864	0	0	0
IDP1	A0A1D8PHH7	Isocitrate dehydrogenase [NADP]		0.467	0	0	0	0	0	0	0	0	0	0	0	0	0	1.2864	0	0	0
NIT3	Q59WF0	Putative hydrolase		0.467	0	0	0	0	0	0	0	0	0	0	0	0	0	1.2864	0	0	0
PHM7	A0A1D8PI19			0.4606	3.3951	0	18.695	15.404	34.328	12.299	42.869	12.059	29.826	12.26	7.6941	0	50.336	5.1456	20.597	2.893	0
VPH1	Q59R99	V-type proton ATPase		0.3904	3.3951	0	2.3369	2.5673	0	0	0	0	0	0	0	0	0	0	2.5746	5.7861	0
orf19.4715	A0A1D8PMG9	PH domain-containing protein		0.3904	0	0	0	2.5673	0	0	0	4.0196	2.9826	2.0433	3.847	0	0	1.2864	0	0	0
orf19.5660.1	A0A1D8PL02	F1F0 ATP synthase subunit e		0.3854	0	0	0	0	0	0	0	0	0	0	0	0	0	2.5728	0	2.893	0
orf19.1993	A0A1D8PGA6	Proteasome regulatory particle lid subunit		0.3854	0	0	0	0	0	0	0	0	0	0	0	0	0	0	0	0	0
HTZ1	Q5AEE1	Histone		0.361	0	0	0	2.5673	0	0	0	0	2.9826	0	3.847	0	0	0	0	0	5.9851
MDG1	A0A1D8PFV7			0.361	0	0	2.3369	7.7018	14.712	0	20.307	20.098	0	0	3.847	0	8.754	0	0	0	0
RPS14B	A0A1D8PDT3	Ribosomal 40S subunit protein S14B		0.361	0	0	0	0	0	0	0	0	0	2.0433	0	0	4.377	1.2864	0	0	0
SEC18	A0A1D8PFN6	AAA family ATPase		0.361	3.3951	0	0	0	0	3.0747	0	0	0	0	0	0	0	0	0	0	0
CMD1	A0A1D8PMF8	Calmodulin		0.361	0	0	0	2.5673	0	0	0	0	0	0	0	0	0	0	0	0	0
orf19.6739	Q5ADV2	Phosphoribomutase		0.361	0	0	0	0	0	0	0	0	0	0	0	0	0	0	0	0	0
orf19.4066	A0A1D8PIC6	PlsC domain-containing protein		0.361	0	0	0	0	0	0	0	0	0	0	0	0	0	0	0	0	0
KTR4	Q59QH4	Putative mannosyltransferase		0.361	0	0	0	0	0	0	0	0	0	0	0	0	0	0	0	0	0
SBP1	Q5ANP6			0.361	0	0	0	0	0	0	0	0	0	0	0	0	0	0	0	0	0
orf19.3859	Q59V93	Very-long-chain 3-oxoacyl-CoA reductase		0.3487	0	0	0	0	0	0	0	0	0	0	0	0	0	0	0	8.6791	0
WBP1	A0A1D8PF22	DDOST--protein glycosyltransferase		0.3487	0	0	0	0	0	0	0	0	0	2.0433	0	0	0	1.2864	0	2.893	0
CWH41	A0A1D8PMH9			0.3487	0	0	0	0	0	0	0	0	0	4.0865	0	0	0	0	0	0	0
DHH1	Q5AAW3	ATP-dependent RNA helicase		0.3487	0	0	0	0	0	0	0	0	0	0	0	0	0	0	0	0	0
orf19.6966	A0A1D8PK80	Bifunctional choline/ethanolamine kinase		0.3487	0	0	0	0	0	0	0	0	0	0	0	0	0	0	0	0	0
LOS1	Q5A0E2	Exportin-T		0.3487	0	0	0	0	0	0	0	0	0	0	0	0	0	1.2864	0	0	0
PNG2	A0A1D8PHH2			0.3437	3.3951	3.4447	7.0107	15.404	4.9041	15.374	27.075	16.078	23.861	8.1731	15.388	10.153	13.131	0	7.7239	8.6791	0
DAP2	A0A1D8PNK0			0.3437	3.3951	0	4.6738	0	0	0	0	0	0	2.0433	0	0	0	0	5.1493	2.893	0
orf19.7310	A0A1D8PTW2	Uncharacterized protein		0.3437	3.3951	10.334	11.685	12.836	4.9041	27.672	33.844	36.177	56.669	12.26	11.541	0	26.262	1.2864	2.5746	2.893	0
orf19.1991	A0A1D8PGD2	Uncharacterized protein		0.3437	3.3951	0	0	2.5673	0	0	2.2563	4.0196	5.9652	2.0433	3.847	0	2.1885	0	0	2.893	0
SSO2	Q59YF0	Protein transport protein		0.3437	3.3951	0	4.6738	0	14.712	0	9.0252	0	2.9826	0	3.847	5.0763	8.754	0	2.5746	0	0
MDH1-1	Q5AMP4	Malate dehydrogenase		0.3437	0	0	0	2.5673	0	0	0	0	2.9826	0	0	0	6.5655	0	0	0	0
CCT7	Q59YH4	T-complex protein 1 subunit eta		0.3437	0	0	0	0	0	0	0	0	0	0	0	0	2.1885	0	0	0	0
RPL19A	A0A1D8PK40	Ribosomal protein L19		0.3437	0	0	0	0	0	0	0	0	2.9826	0	0	0	0	1.2864	0	0	0
RPS21B	A0A1D8PCG7	40S ribosomal protein S21		0.3437	0	0	0	0	0	0	0	0	0	0	0	0	0	0	0	0	0
orf19.4171	A0A1D8PL57	ATPase_2 domain-containing protein		0.3437	0	0	0	0	0	0	0	0	0	0	0	0	0	0	0	0	0
ERV29	Q5AMR7			0.3437	0	0	0	0	0	0	0	0	0	0	0	0	0	0	0	0	0
NMT1	P30418	Glycylpeptide N-tetradecanoyltransferase		0.3437	0	0	0	0	0	0	0	0	0	0	0	0	0	0	0	0	0
GST2	Q5AFB4			0.3437	0	0	0	0	0	0	0	0	0	0	0	0	0	0	0	0	0
orf19.4952.1	A0A1D8PFM9	Peptidylprolyl isomerase		0.3437	0	0	0	0	0	0	0	0	0	0	0	0	0	0	0	0	0
TRR1	Q5AG89	Thioredoxin reductase		0.3437	0	0	0	0	0	0	0	0	0	0	0	0	0	1.2864	0	0	0
URM1	Q59JW3	Ubiquitin-related modifier		0.3437	0	0	0	0	0	0	0	0	0	0	0	0	0	1.2864	0	0	0
UAP1	A0A1D8PNG6	UDP-N-acetylglucosamine diphosphorylase		0.3437	0	0	0	0	0	0	0	0	0	0	0	0	0	0	0	0	0
ERG2	A0A1D8PCB9	C-8 sterol isomerase		0.3419	0	0	0	0	0	0	0	0	0	0	0	0	0	0	0	2.893	0
CRC1	Q5A967	Carnitine:acyl carnitine antiporter		0.3419	0	0	0	0	0	0	0	0	0	0	0	0	0	1.2864	0	2.893	0
ALD5	A0A1D8PGT5	Aldehyde dehydrogenase		0.3419	0	0	2.3369	0	0	0	0	0	0	0	0	0	0	0	0	0	0
RIB4	A0A1D8PDK6	6,7-dimethyl-8-ribityllumazine synthase		0.3419	0	0	0	0	0	0	0	0	0	0	0	0	0	0	0	0	0
ARP3	Q59Z11	Actin-related protein		0.3419	0	0	0	0	0	0	0	0	0	0	0	0	0	0	0	0	0
orf19.6658	A0A1D8PNP4	Uncharacterized protein		0.3419	0	0	0	0	0	0	0	0	0	0	0	0	0	1.2864	0	0	0
orf19.4521	Q59TB0	Uncharacterized protein		0.3419	0	0	0	0	0	0	0	0	0	0	0	0	0	0	0	0	0
ALI1	A0A1D8PJ73			0.3135	0	0	0	0	0	0	0	0	0	0	0	0	0	0	0	5.7861	0
orf19.6035	Q5ABD5	Uncharacterized protein		0.3135	0	0	0	0	0	0	0	0	0	0	0	0	0	0	2.5746	2.893	0
RPS5	Q5AG43	Ribosomal 40S subunit protein S5		0.3135	6.7902	3.4447	2.3369	2.5673	4.9041	0	2.2563	0	0	0	0	0	2.1885	0	0	2.893	0
RPL39	A0A1D8PH21	60S ribosomal protein L36		0.3135	0	0	0	0	0	0	0	0	0	0	0	0	0	0	2.5746	0	0
orf19.5281	A0A1D8PF90	Uncharacterized protein		0.3135	0	0	0	0	0	0	0	0	0	0	0	0	0	0	2.5746	0	0
CRL1	Q5A904	Rho family GTPase		0.3135	6.7902	0	0	0	0	0	6.7689	0	14.913	0	0	0	6.5655	0	0	0	0
VMA2	Q59PT0	V-type proton ATPase subunit B		0.3135	0	0	0	5.1345	0	0	0	0	0	0	0	0	4.377	1.2864	0	0	0
VPS21	Q59X89	Rab family GTPase		0.3135	0	0	0	0	0	0	2.2563	0	2.9826	0	0	0	2.1885	0	0	0	0
RPL24A	Q5A6A1	Ribosomal 60S subunit protein L24A		0.3135	3.3951	0	2.3369	0	0	3.0747	0	0	0	0	0	0	2.1885	0	0	0	0
RPS10	A0A1D8PI15	Ribosomal 40S subunit protein S10A		0.3135	0	0	0	0	4.9041	0	0	0	0	0	0	0	2.1885	0	0	0	0
YCF1	A0A1D8PR42	GSH S-conjugate transporter		0.3135	0	0	0	2.5673	0	0	0	0	0	0	0	0	2.1885	0	0	0	0
RPL3	Q59LS1	Ribosomal 60S subunit protein L3		0.3135	0	0	0	0	0	0	0	0	0	0	0	0	2.1885	0	0	0	0
RHB1	Q5ANA9	Putative GTPase		0.3135	0	0	0	0	0	0	0	0	2.9826	0	0	0	0	0	0	0	0
RPL10	Q5AIB8	Ribosomal 60S subunit protein L10		0.3135	0	0	0	0	0	0	2.2563	0	0	0	0	0	0	0	0	0	0
RCT1	A0A1D8PKD1			0.3135	10.185	0	0	0	0	0	0	0	0	0	0	0	0	0	0	0	0
MEX67	P84149	mRNA export factor		0.3135	3.3951	0	0	0	0	0	0	0	0	0	0	0	0	0	0	0	0
RPN5	A0A1D8PP77	Proteasome regulatory particle lid subunit		0.3135	3.3951	0	0	0	0	0	0	0	0	0	0	0	0	0	0	0	0
PHO15	Q59WC5	4-nitrophenylphosphatase		0.3135	0	0	0	0	0	0	0	0	0	0	0	0	0	0	0	0	0
orf19.891	Q5AHA6	AMP deaminase		0.3135	0	0	0	0	0	0	0	0	0	0	0	0	0	0	0	0	0
orf19.5961	Q5ANE2	ANK_REP_REGION domain-containing protein		0.3135	0	0	0	0	0	0	0	0	0	0	0	0	0	1.2864	0	0	0
APA2	A0A1D8PQ57	Bifunctional phosphorylase/ADP sulfurylase		0.3135	0	0	0	0	0	0	0	0	0	0	0	0	0	0	0	0	0
orf19.6867	A0A1D8PHE5	Cytochrome b5 heme-binding protein		0.3135	0	0	0	0	0	0	0	0	0	0	0	0	0	0	0	0	0
ARA1	A0A1D8PI24	D-arabinose 1-dehydrogenase		0.3135	0	0	0	0	0	0	0	0	0	0	0	0	0	0	0	0	0
orf19.5773	A0A1D8PQB4	Dipeptidyl peptidase		0.3135	0	0	0	0	0	0	0	0	0	0	0	0	0	0	0	0	0
MVD	A0A1D8PC43	Diphosphomevalonate decarboxylase		0.3135	0	0	0	0	0	0	0	0	0	0	0	0	0	0	0	0	0
RPB8	Q59MZ8	DNA-directed RNA polymerases I, II, and III		0.3135	0	0	0	0	0	0	0	0	0	0	0	0	0	0	0	0	0
orf19.2930	A0A1D8PCQ3	Eukaryotic translation initiation factor		0.3135	0	0	0	0	0	0	0	0	0	0	0	0	0	0	0	0	0
GUS1	A0A1D8PQL8	Glutamate--tRNA ligase		0.3135	0	0	0	0	0	0	0	0	0	0	0	0	0	0	0	0	0
IPK2	Q59YE9	Kinase		0.3135	0	0	0	0	0	0	0	0	0	0	0	0	0	0	0	0	0
GLO1	Q5ABB2	Lactoylglutathione lyase		0.3135	0	0	0	0	0	0	0	0	0	0	0	0	0	0	0	0	0
GRX3	Q5AF81	Monothiol glutaredoxin		0.3135	0	0	0	0	0	0	0	0	0	0	0	0	0	0	0	0	0
orf19.4340.1	A0A1D8PNM3	mRNA splicing protein		0.3135	0	0	0	0	0	0	0	0	0	0	0	0	0	0	0	0	0
ARG3	Q5ABU0	Ornithine carbamoyltransferase		0.3135	0	0	0	0	0	0	0	0	0	0	0	0	0	0	0	0	0
OYE32	A0A1D8PMP0			0.3135	0	0	0	0	0	0	0	0	0	0	0	0	0	0	0	0	0
MXR1	Q5AD39	Peptide-methionine-S-sulfoxide reductase		0.3135	0	0	0	0	0	0	0	0	0	0	0	0	0	0	0	0	0
PHO100	Q59WE5			0.3135	0	0	0	0	0	0	0	0	0	0	0	0	0	0	0	0	0
ARO3	A0A1D8PGI8	P-2-dehydro-3-deoxyheptonate aldolase		0.3135	0	0	0	0	0	0	0	0	0	0	0	0	0	0	0	0	0
orf19.1058	A0A1D8PDB0	Proteasome regulatory particle lid subunit		0.3135	0	0	0	0	0	0	0	0	0	0	0	0	0	0	0	0	0
RPL21A	A0A1D8PGY0	Ribosomal 60S subunit protein L21A		0.3135	0	0	0	0	0	0	0	0	0	0	0	0	0	0	0	0	0
MEU1	Q59ST1	S-methyl-5'-thioadenosine phosphorylase		0.3135	0	0	0	0	0	0	0	0	0	0	0	0	0	0	0	0	0
TFS1	Q5A1M1			0.3135	0	0	0	0	0	0	0	0	0	0	0	0	0	0	0	0	0
THR4	A0A1D8PNG9	Threonine synthase		0.3135	0	0	0	0	0	0	0	0	0	0	0	0	0	0	0	0	0
orf19.6160	A0A1D8PJ10	Uncharacterized protein		0.3135	0	0	0	0	0	0	0	0	0	0	0	0	0	0	0	0	0
VAS1	A0A1D8PHR0	Valine--tRNA ligase		0.3135	0	0	0	0	0	0	0	0	0	0	0	0	0	0	0	0	0
FTR2	A0A1D8PFV2			0.307	0	0	0	0	0	0	0	0	2.9826	0	0	0	6.5655	0	0	0	0
VAC7	Q59PA6			0.307	0	0	0	0	0	0	0	0	0	2.0433	0	0	0	0	0	0	0
RPL13	O59931	60S ribosomal protein L13		0.307	0	0	0	0	0	0	0	0	0	0	0	0	0	0	0	0	0
PPH21	A0A1D8PJ80	Serine/threonine-protein phosphatase		0.307	0	0	0	0	0	0	0	0	0	0	0	0	0	0	0	0	0
orf19.7056	A0A1D8PQM7	AA_permease domain-containing protein		0.1952	6.7902	3.4447	0	0	0	0	2.2563	0	2.9826	0	0	0	2.1885	0	0	5.7861	0
COX2	Q9B8D8	Cytochrome c oxidase subunit 2		0.1952	0	3.4447	0	0	0	0	0	0	0	0	0	0	2.1885	1.2864	0	2.893	0
orf19.1860.1	A0A1D8PHY7	AB hydrolase-1 domain-containing protein		0.1952	0	0	0	0	0	0	2.2563	0	0	0	0	0	0	1.2864	0	0	0
GSY1	Q5A850	Glycogen [starch] synthase		0.1952	0	0	0	0	0	0	2.2563	0	0	0	0	0	0	0	0	0	0
TFP1	Q5AJB1	V-type proton ATPase catalytic subunit A		0.1952	0	0	0	2.5673	0	0	0	0	0	0	0	0	0	0	0	0	0
TIP120	Q5ADW3	Cullin-associated NEDD8-dissociated protein		0.1952	0	0	0	0	0	0	0	0	0	0	0	0	0	0	0	0	0
PRT1	Q5AGV4	Eukaryotic translation initiation factor 3		0.1952	0	0	0	0	0	0	0	0	0	0	0	0	0	0	0	0	0
orf19.3136	Q5A0W0			0.1952	0	0	0	0	0	0	0	0	0	0	0	0	0	0	0	0	0
orf19.2200	Q5A2K5	L-type lectin-like domain-containing protein		0.1952	0	0	0	0	0	0	0	0	0	0	0	0	0	0	0	0	0
MKC1	Q5AAG6	Mitogen-activated protein kinase		0.1952	0	0	0	0	0	0	0	0	0	0	0	0	0	0	0	0	0
NMD5	Q59SI4			0.1952	0	0	0	0	0	0	0	0	0	0	0	0	0	0	0	0	0
orf19.2002	A0A1D8PGB0	Nuclear pore protein		0.1952	0	0	0	0	0	0	0	0	0	0	0	0	0	0	0	0	0
RFA1	Q5ACX4	Replication protein A subunit		0.1952	0	0	0	0	0	0	0	0	0	0	0	0	0	0	0	0	0
SPA2	A0A1D8PFH4			0.1952	0	0	0	0	0	0	0	0	0	0	0	0	0	0	0	0	0
orf19.5085	A0A1D8PEA9	TOG domain-containing protein		0.1952	0	0	0	0	0	0	0	0	0	0	0	0	0	1.2864	0	0	0
GCD6	P87163	Translation initiation factor		0.1952	0	0	0	0	0	0	0	0	0	0	0	0	0	0	0	0	0
TIF4631	A0A1D8PI73	Translation initiation factor		0.1952	0	0	0	0	0	0	0	0	0	0	0	0	0	0	0	0	0
orf19.7511	A0A1D8PRM4	Uncharacterized protein		0.1952	0	0	0	0	0	0	0	0	0	0	0	0	0	1.2864	0	0	0
orf19.6604	A0A1D8PU09	Uncharacterized protein		0.1952	0	0	0	0	0	0	0	0	0	0	0	0	0	1.2864	0	0	0
orf19.7199	A0A1D8PRF3	Uncharacterized protein		0.1952	0	0	0	0	0	0	0	0	0	0	0	0	0	0	0	0	0
orf19.4735	A0A1D8PEE6	Uncharacterized protein		0.1952	0	0	0	0	0	0	0	0	0	0	0	0	0	1.2864	0	0	0
HGT7	A0A1D8PG81			0.1902	0	10.334	7.0107	0	0	0	0	0	0	0	0	5.0763	17.508	0	0	0	5.9851
ATP18	A0A1D8PG50	F1F0 ATP synthase subunit i		0.1902	3.3951	3.4447	2.3369	2.5673	4.9041	0	4.5126	0	0	0	3.847	0	2.1885	0	2.5746	2.893	0
orf19.449	A0A1D8PDH0	Uncharacterized protein		0.1902	0	0	0	0	0	0	2.2563	0	0	2.0433	0	0	2.1885	0	0	0	0
orf19.2328	A0A1D8PEZ3	Uncharacterized protein		0.1902	0	0	0	0	0	0	2.2563	0	0	0	0	0	2.1885	1.2864	0	0	0
RPA135	A0A1D8PQM4	DNA-directed RNA polymerase subunit beta		0.1902	0	0	0	0	0	0	2.2563	0	0	0	0	0	0	0	0	0	0
RPS27	A0A1D8PTI7	40S ribosomal protein S27		0.1902	0	0	0	0	0	0	0	0	0	0	0	0	0	0	0	0	0
PXP2	Q5AJD6	Acyl-coenzyme A oxidase		0.1902	0	0	0	0	0	0	0	0	0	0	0	0	0	0	0	0	0
CTA3	A0A1D8PF53			0.1902	0	0	0	0	0	0	0	0	0	0	0	0	0	0	0	0	0
orf19.6358	A0A1D8PFF9	E2 ubiquitin-conjugating protein		0.1902	0	0	0	0	0	0	0	0	0	0	0	0	0	0	0	0	0
MYO1	A0A1D8PN92	Myosin 1		0.1902	0	0	0	0	0	0	0	0	0	0	0	0	0	0	0	0	0
PFK26	A0A1D8PEF9			0.1902	0	0	0	0	0	0	0	0	0	0	0	0	0	0	0	0	0
SRO77	Q59RK1	Putative Rab GTPase-binding protein		0.1902	0	0	0	0	0	0	0	0	0	0	0	0	0	0	0	0	0
orf19.2175	A0A1D8PI22	Pyr_redox_2 domain-containing protein		0.1902	0	0	0	0	0	0	0	0	0	0	0	0	0	0	0	0	0
RPL16A	Q5AB87	Ribosomal 60S subunit protein L16A		0.1902	0	0	0	0	0	0	0	0	0	0	0	0	0	0	0	0	0
orf19.6220.4	A0A1D8PDZ1	Ribosomal 60S subunit protein L34B		0.1902	0	0	0	0	0	0	0	0	0	0	0	0	0	0	0	0	0
orf19.2720	A0A1D8PLN3	T-complex protein 1 subunit delta		0.1902	0	0	0	0	0	0	0	0	0	0	0	0	0	0	0	0	0
CCT3	Q5AK16	T-complex protein 1 subunit gamma		0.1902	0	0	0	0	0	0	0	0	0	0	0	0	0	0	0	0	0
SPT6	Q3MNT0	Transcription elongation factor SPT6		0.1902	0	0	0	0	0	0	0	0	0	0	0	0	0	0	0	0	0
orf19.6853	A0A1D8PDC7	Uncharacterized protein		0.1902	0	0	0	0	0	0	0	0	0	0	0	0	0	0	0	0	0
orf19.6066	A0A1D8PC76	Aldehyde dehydrogenase		0.1535	0	0	0	5.1345	14.712	3.0747	11.281	4.0196	2.9826	0	3.847	0	4.377	0	2.5746	11.572	0
PRB1	Q59Z57			0.1535	10.185	0	2.3369	2.5673	0	0	0	0	0	14.303	7.6941	0	0	0	5.1493	5.7861	0
orf19.364	A0A1D8PKX3	V-type proton ATPase subunit		0.1535	0	0	2.3369	0	0	0	4.5126	0	0	0	0	0	2.1885	0	0	5.7861	0
LSP1	Q59KV8	Lipid-binding protein		0.1535	6.7902	6.8894	2.3369	17.971	44.137	3.0747	18.05	16.078	14.913	4.0865	7.6941	0	26.262	1.2864	2.5746	2.893	0
FRE7	A0A1D8PTG2			0.1535	6.7902	0	2.3369	0	0	0	2.2563	0	0	6.1298	3.847	0	6.5655	0	2.5746	2.893	0
ATO1	A0A1D8PJ22			0.1535	0	0	0	0	0	0	0	0	0	0	0	0	0	0	2.5746	2.893	0
SIS1	Q59V92	Type II HSP40 co-chaperone		0.1535	0	0	2.3369	0	0	0	2.2563	0	0	2.0433	0	0	2.1885	0	0	2.893	0
ALO1	O93852	D-arabinono-1,4-lactone oxidase		0.1535	0	0	0	0	0	0	0	0	0	0	0	0	0	0	0	2.893	0
orf19.5669	Q59UQ1	Uncharacterized protein		0.1535	0	0	0	0	0	0	0	0	0	0	0	0	0	0	0	2.893	0
LCL2	Q59PT4	Long chronological lifespan protein		0.1535	0	3.4447	2.3369	0	0	0	0	0	2.9826	0	0	0	0	0	5.1493	0	0
PRC3	A0A1D8PDM9	Carboxypeptidase		0.1535	0	0	0	0	0	0	0	0	2.9826	0	0	0	0	0	2.5746	0	0
ACB1	A0A1D8PQN3	Long-chain fatty acid transporter		0.1535	0	0	0	0	0	3.0747	2.2563	0	2.9826	0	0	0	4.377	0	0	0	0
FLC1	A0A1D8PJ45	Putative flavin ADP transporter		0.1535	0	0	0	2.5673	0	0	4.5126	0	2.9826	2.0433	0	0	2.1885	1.2864	0	0	0
RET2	A0A1D8PND9	Coatomer subunit delta		0.1535	0	0	0	0	0	0	2.2563	4.0196	0	0	0	0	0	0	0	0	0
FAA4	A0A1D8PU56	Long-chain fatty acid-CoA ligase		0.1535	0	0	0	0	4.9041	0	2.2563	0	0	0	0	0	0	0	0	0	0
CTN1	Q59T80	Carnitine O-acetyltransferase		0.1535	0	0	0	0	0	0	2.2563	0	0	0	0	0	0	0	0	0	0
TRM2	A0A1D8PCG3			0.1535	0	0	0	0	0	3.0747	0	0	0	0	0	0	0	0	0	0	0
DAK2	A0A1D8PEI2	Dihydroxyacetone kinase		0.1535	0	0	2.3369	0	0	0	0	0	0	0	0	0	0	1.2864	0	0	0
orf19.4149.1	A0A1D8PN83	Ribosomal 40S subunit protein S11A		0.1535	3.3951	0	0	0	0	0	0	0	0	0	0	0	0	0	0	0	0
AGE3	A0A1D8PCP6			0.1535	0	0	0	0	0	0	0	0	0	0	0	0	0	0	0	0	0
SEC26	Q5A6M6	Coatomer subunit beta		0.1535	0	0	0	0	0	0	0	0	0	0	0	0	0	1.2864	0	0	0
GCR3	A0A1D8PEB4			0.1535	0	0	0	0	0	0	0	0	0	0	0	0	0	0	0	0	0
GIT2	A0A1D8PN12	Glycerophosphodiester transporter		0.1535	0	0	0	0	0	0	0	0	0	0	0	0	0	0	0	0	0
HIS4	A0A1D8PKY7	His biosynthesis trifunctional protein		0.1535	0	0	0	0	0	0	0	0	0	0	0	0	0	2.5728	0	0	0
HAT2	Q59RH5	Histone acetyltransferase type B subunit 2		0.1535	0	0	0	0	0	0	0	0	0	0	0	0	0	0	0	0	0
IRC22-2	Q59XW9	Increased recombination centers protein		0.1535	0	0	0	0	0	0	0	0	0	0	0	0	0	0	0	0	0
MMD1	A0A1D8PDX5	Isoleucine biosynthesis protein		0.1535	0	0	0	0	0	0	0	0	0	0	0	0	0	0	0	0	0
LMO1	A0A1D8PR98			0.1535	0	0	0	0	0	0	0	0	0	0	0	0	0	0	0	0	0
FAT1	Q59NN4	Long-chain fatty acid transporter		0.1535	0	0	0	0	0	0	0	0	0	0	0	0	0	0	0	0	0
MDN1	A0A1D8PL61	Midasin		0.1535	0	0	0	0	0	0	0	0	0	0	0	0	0	0	0	0	0
MLC1	A0A1D8PSE1			0.1535	0	0	0	0	0	0	0	0	0	0	0	0	0	0	0	0	0
orf19.5054	A0A1D8PE45	Nicotinate-nucleotide pyrophosphorylase		0.1535	0	0	0	0	0	0	0	0	0	0	0	0	0	0	0	0	0
NAP1	Q5AAI8	Nucleosome assembly protein		0.1535	0	0	0	0	0	0	0	0	0	0	0	0	0	0	0	0	0
CPR3	Q5ALM6	Peptidyl-prolyl cis-trans isomerase		0.1535	0	0	0	0	0	0	0	0	0	0	0	0	0	0	0	0	0
ARO4	P79023	P-2-dehydro-3-deoxyheptonate aldolase		0.1535	0	0	0	0	0	0	0	0	0	0	0	0	0	0	0	0	0
orf19.2124	A0A1D8PQE3	PKS_ER domain-containing protein		0.1535	0	0	0	0	0	0	0	0	0	0	0	0	0	0	0	0	0
RPN7	A0A1D8PTV0	Proteasome regulatory particle lid subunit		0.1535	0	0	0	0	0	0	0	0	0	0	0	0	0	0	0	0	0
PRO3	A0A1D8PKZ7	Pyrroline-5-carboxylate reductase		0.1535	0	0	0	0	0	0	0	0	0	0	0	0	0	1.2864	0	0	0
RAD23	A0A1D8PGE3			0.1535	0	0	0	0	0	0	0	0	0	0	0	0	0	0	0	0	0
SIT4	Q59KY8	Serine/threonine-protein phosphatase		0.1535	0	0	0	0	0	0	0	0	0	0	0	0	0	0	0	0	0
SKN1	A0A1D8PKE1			0.1535	0	0	0	0	0	0	0	0	0	0	0	0	0	0	0	0	0
THS1	A0A1D8PMV9	Threonine--tRNA ligase		0.1535	0	0	0	0	0	0	0	0	0	0	0	0	0	0	0	0	0
EFB1	A0A1D8PM35	Translation elongation factor 1 subunit beta		0.1535	0	0	0	0	0	0	0	0	0	0	0	0	0	0	0	0	0
YDJ1	A0A1D8PSQ3	Type I HSP40 co-chaperone		0.1535	0	0	0	0	0	0	0	0	0	0	0	0	0	0	0	0	0
orf19.1578	A0A1D8PGR5	Uncharacterized protein		0.1535	0	0	0	0	0	0	0	0	0	0	0	0	0	0	0	0	0
orf19.5201.1	A0A1D8PD97	Uncharacterized protein		0.1535	0	0	0	0	0	0	0	0	0	0	0	0	0	0	0	0	0
orf19.2228	A0A1D8PHR2	Uncharacterized protein		0.1535	0	0	0	0	0	0	0	0	0	0	0	0	0	0	0	0	0
VMA5	Q5A2U9	V-type proton ATPase subunit C		0.1535	0	0	0	0	0	0	0	0	0	0	0	0	0	0	0	0	0
orf19.4029	A0A1D8PP79	WD_REPEATS_REGION domain protein		0.1535	0	0	0	0	0	0	0	0	0	0	0	0	0	0	0	0	0
PTC7	A0A1D8PL06	Protein phosphatase		0	0	0	0	0	0	0	0	0	0	0	0	0	0	0	0	0	5.9851
orf19.7590	A0A1D8PU51	Uncharacterized protein		0	3.3951	0	0	0	0	0	0	0	0	0	0	0	0	0	0	23.144	0
SSA2	P46587	Heat shock protein		0	16.976	20.668	0	12.836	24.52	0	0	0	11.93	0	0	0	15.32	0	12.873	17.358	0
QCR7	Q5ABS1	Cytochrome b-c1 complex subunit 7		0	6.7902	0	2.3369	0	0	0	0	0	0	0	0	0	0	0	2.5746	17.358	0
orf19.5342	Q5A5Q7	Metallophos domain-containing protein		0	16.976	17.224	2.3369	2.5673	0	6.1494	6.7689	8.0392	11.93	4.0865	11.541	5.0763	4.377	0	10.299	11.572	0
YHM1	A0A1D8PPR4			0	10.185	0	0	0	0	0	2.2563	0	0	0	0	0	0	0	0	11.572	0
orf19.2954	A0A1D8PCU5	Uncharacterized protein		0	3.3951	3.4447	2.3369	0	0	0	0	0	0	0	0	0	0	0	0	11.572	0
TOM40	Q5AH14			0	0	0	0	0	0	0	4.5126	0	0	0	0	0	4.377	0	2.5746	8.6791	0
CYT1	A0A1D8PHA3	Q10--cytochrome-c reductase catalytic subunit		0	0	6.8894	0	0	0	0	2.2563	0	0	0	0	0	0	0	2.5746	8.6791	0
orf19.3518	A0A1D8PT04	Mitochondrial 2-oxodicarboxylate carrier		0	0	6.8894	4.6738	0	0	0	0	0	0	0	0	0	0	1.2864	0	8.6791	0
NUO2	Q5AEI1			0	3.3951	0	4.6738	0	0	0	0	0	0	0	0	0	0	0	0	8.6791	0
orf19.1549	A0A1D8PGJ9	Uncharacterized protein		0	0	0	2.3369	0	0	0	0	0	0	0	0	0	0	0	0	8.6791	0
orf19.6552	Q5AGY6	Sulfhydryl oxidase		0	10.185	6.8894	7.0107	0	0	0	0	4.0196	2.9826	0	0	0	4.377	0	7.7239	5.7861	0
CRD2	A0A1D8PL78			0	3.3951	3.4447	0	0	0	0	0	0	0	0	0	0	0	0	2.5746	5.7861	0
UGA1	A0A1D8PH55	4-aminobutyrate transaminase		0	0	3.4447	0	0	0	0	2.2563	0	0	0	0	0	0	0	0	5.7861	0
PHO23	A0A1D8PIP3	Chromatin modification-related protein		0	6.7902	0	0	0	9.8081	0	0	0	0	0	0	0	0	0	0	5.7861	0
orf19.5077	Q5A785	Uncharacterized protein		0	3.3951	0	0	0	0	0	0	0	0	0	0	0	0	0	0	5.7861	0
HEM15	Q59U72	Ferrochelatase		0	0	0	0	0	0	0	0	0	0	0	0	0	0	0	0	5.7861	0
orf19.1682	A0A1D8PJA6	NAD(P)-bd_dom domain-containing protein		0	0	0	0	0	0	0	0	0	0	0	0	0	0	1.2864	0	5.7861	0
SAM51	A0A1D8PN01			0	0	0	0	0	0	0	0	0	0	0	0	0	0	0	0	5.7861	0
QCR8	A0A1D8PHA2	Q10--cytochrome-c reductase subunit 8		0	0	0	0	0	0	0	0	0	0	0	0	0	0	2.5728	0	5.7861	0
ABG1	A0A1D8PIH3			0	6.7902	10.334	4.6738	0	0	3.0747	6.7689	8.0392	2.9826	4.0865	3.847	5.0763	4.377	0	7.7239	2.893	0
GNP1	Q59RL1	Amino acid transporter		0	6.7902	0	0	2.5673	0	0	2.2563	0	0	0	0	0	2.1885	0	7.7239	2.893	0
orf19.6578	Q5AGW0	MFS domain-containing protein		0	3.3951	0	0	0	0	0	2.2563	4.0196	0	0	0	0	2.1885	1.2864	5.1493	2.893	0
ENA21	Q5A5B0			0	0	0	2.3369	0	4.9041	0	4.5126	8.0392	2.9826	0	0	0	10.943	0	2.5746	2.893	0
orf19.2838	A0A1D8PSB1	Uncharacterized protein		0	3.3951	0	2.3369	0	0	6.1494	0	0	0	2.0433	3.847	0	2.1885	0	2.5746	2.893	0
RPN3	A0A1D8PD15	Proteasome regulatory particle lid subunit		0	3.3951	0	0	0	0	0	0	0	0	2.0433	0	0	2.1885	1.2864	2.5746	2.893	0
CHS2	A0A1D8PTV3	Chitin synthase		0	0	0	0	0	4.9041	0	4.5126	0	2.9826	0	0	0	2.1885	0	2.5746	2.893	0
orf19.3286	A0A1D8PRS1	Uncharacterized protein		0	3.3951	3.4447	2.3369	2.5673	0	0	0	0	0	2.0433	0	0	0	0	2.5746	2.893	0
SDH2	Q59QN7	Succinate dehydrogenase iron-sulfur subunit		0	0	3.4447	0	0	0	0	0	0	0	0	0	0	0	0	2.5746	2.893	0
DPP3	Q5AH74	DAG diphosphate/phosphatidate phosphatase		0	3.3951	0	0	0	0	0	0	0	0	0	0	0	0	0	2.5746	2.893	0
END3	Q5AJ82	Actin cytoskeleton-regulatory complex protein		0	0	0	0	0	0	0	0	0	0	0	0	0	0	1.2864	2.5746	2.893	0
COX4	Q5ALV5	Cytochrome c oxidase subunit IV		0	0	0	0	0	0	0	0	0	0	0	0	0	0	0	2.5746	2.893	0
orf19.1618.1	A0A1D8PJE5	Uncharacterized protein		0	0	0	0	0	0	0	0	0	0	0	0	0	0	0	2.5746	2.893	0
PIL1	A0A1D8PDD1	Lipid-binding protein		0	6.7902	0	2.3369	17.971	53.945	0	31.588	28.137	26.843	6.1298	11.541	0	35.016	0	0	2.893	0
orf19.4805	A0A1D8PEK8	Uncharacterized protein		0	0	0	0	0	4.9041	0	9.0252	4.0196	0	0	0	0	8.754	1.2864	0	2.893	0
VRG4	Q5A477	GDP-mannose transporter		0	0	0	0	0	0	0	0	0	0	0	0	0	2.1885	1.2864	0	2.893	0
TIM50	Q59W44	Mitochondrial import inner membrane translocase subunit TIM50		0	0	0	0	0	0	0	0	0	2.9826	0	0	0	0	1.2864	0	2.893	0
RIM1	Q5AA01			0	0	0	2.3369	0	4.9041	3.0747	0	0	0	0	0	0	0	0	0	2.893	0
orf19.1152	A0A1D8PF63	Uncharacterized protein		0	3.3951	3.4447	0	2.5673	0	0	0	0	0	0	0	0	0	0	0	2.893	0
COX6	A0A1D8PH08	Cytochrome c oxidase subunit VI		0	0	3.4447	0	0	0	0	0	0	0	0	0	0	0	0	0	2.893	0
TVP18	Q5APC0	Golgi apparatus membrane protein		0	3.3951	0	0	0	0	0	0	0	0	0	0	0	0	0	0	2.893	0
NAD5	Q9B8C9	NADH-ubiquinone oxidoreductase chain 5		0	3.3951	0	0	0	0	0	0	0	0	0	0	0	0	0	0	2.893	0
PFK1	Q5AK53	ATP-dependent 6-phosphofructokinase		0	0	0	0	0	0	0	0	0	0	0	0	0	0	0	0	2.893	0
RIP1	A0A1D8PJX3	Cytochrome b-c1 complex, mitochondrial		0	0	0	0	0	0	0	0	0	0	0	0	0	0	0	0	2.893	0
COX13	Q5ALV9	Cytochrome c oxidase subunit 6A		0	0	0	0	0	0	0	0	0	0	0	0	0	0	0	0	2.893	0
DRG1	Q5A779	GTP-binding protein		0	0	0	0	0	0	0	0	0	0	0	0	0	0	0	0	2.893	0
MYO5	Q59MQ0	Myosin-5		0	0	0	0	0	0	0	0	0	0	0	0	0	0	1.2864	0	2.893	0
PHB1	Q59SS4	Prohibitin		0	0	0	0	0	0	0	0	0	0	0	0	0	0	0	0	2.893	0
orf19.846	A0A1D8PH10	Protein kinase		0	0	0	0	0	0	0	0	0	0	0	0	0	0	0	0	2.893	0
RCF1	Q59N74	Respiratory supercomplex factor 1		0	0	0	0	0	0	0	0	0	0	0	0	0	0	0	0	2.893	0
orf19.4468	A0A1D8PD61	Succinate dehydrogenase Cyt b small subunit		0	0	0	0	0	0	0	0	0	0	0	0	0	0	0	0	2.893	0
orf19.2863	A0A1D8PSD5	Uncharacterized protein		0	0	0	0	0	0	0	0	0	0	0	0	0	0	0	0	2.893	0
orf19.3290	A0A1D8PCD3	Uncharacterized protein		0	0	0	0	0	0	0	0	0	0	0	0	0	0	0	0	2.893	0
GLR1	Q59NQ5	Glutathione reductase		0	0	0	11.685	0	4.9041	0	2.2563	0	0	0	0	0	2.1885	0	5.1493	0	0
orf19.1780	Q59XS8	Uncharacterized protein		0	0	0	2.3369	2.5673	4.9041	6.1494	6.7689	12.059	8.9478	4.0865	7.6941	0	4.377	0	2.5746	0	0
FRE30	A0A1D8PTF8			0	10.185	0	0	0	0	0	0	0	0	2.0433	0	0	2.1885	1.2864	2.5746	0	0
orf19.5006.1	A0A1D8PFS0	SNAP receptor		0	3.3951	3.4447	2.3369	2.5673	4.9041	3.0747	0	0	8.9478	0	0	0	2.1885	0	2.5746	0	0
NDC80	Q5A216	Probable kinetochore protein NDC80		0	3.3951	0	0	0	0	0	0	0	0	0	0	0	2.1885	0	2.5746	0	0
ECM14	A0A1D8PJK3	Putative metallocarboxypeptidase		0	6.7902	3.4447	0	0	0	0	0	0	2.9826	6.1298	3.847	0	0	0	2.5746	0	0
ATG15	Q5A4N0	Putative lipase		0	10.185	3.4447	0	0	0	0	0	0	0	2.0433	0	0	0	0	2.5746	0	0
orf19.4779	A0A1D8PEJ7	Basic amino acid transporter		0	0	0	0	2.5673	0	0	2.2563	0	0	0	0	0	0	0	2.5746	0	0
orf19.7596	A0A1D8PU57	Uncharacterized protein		0	0	3.4447	9.3476	0	0	0	2.2563	0	0	0	0	0	0	0	2.5746	0	0
DPH5	Q59NX9	Diphthine methyl ester synthase 1		0	0	0	2.3369	2.5673	0	0	0	0	0	0	0	0	0	0	2.5746	0	0
SNL1	Q59NB3			0	0	3.4447	0	0	0	0	0	0	0	0	0	0	0	0	2.5746	0	0
orf19.1107	Q59N81	Uncharacterized protein		0	13.58	0	0	0	0	0	0	0	0	0	0	0	0	0	2.5746	0	0
PHO84	A0A1D8PF54	Phosphate transporter		0	3.3951	0	0	0	0	0	0	0	0	0	0	0	0	0	2.5746	0	0
orf19.7566	A0A1D8PU37	AA_permease domain-containing protein		0	0	0	0	0	0	0	0	0	0	0	0	0	0	0	2.5746	0	0
FRP6	Q5A4K0			0	0	0	0	0	0	0	0	0	0	0	0	0	0	1.2864	2.5746	0	0
MAL31	Q5AK39	Maltose permease		0	0	0	0	0	0	0	0	0	0	0	0	0	0	0	2.5746	0	0
orf19.7052	A0A1D8PQN8	PI-3-/phosphoinositide 5-phosphatase		0	0	0	0	0	0	0	0	0	0	0	0	0	0	0	2.5746	0	0
orf19.6887	Q59T30	Uncharacterized protein		0	0	0	0	0	0	0	0	0	0	0	0	0	0	0	2.5746	0	0
HXT5	A0A1D8PSH1			0	0	0	0	2.5673	0	0	4.5126	0	2.9826	0	0	0	13.131	0	0	0	0
SNQ2	A0A1D8PQ95	ATP-binding cassette transporter		0	0	0	0	0	0	0	4.5126	0	0	0	0	0	10.943	0	0	0	0
HSP30	Q59TA5			0	0	0	4.6738	2.5673	4.9041	0	9.0252	8.0392	11.93	2.0433	3.847	0	8.754	0	0	0	0
orf19.3983	A0A1D8PP33	Uncharacterized protein		0	0	0	0	0	4.9041	0	0	0	0	0	0	0	8.754	0	0	0	0
FRE10	Q59PA1			0	0	0	4.6738	5.1345	4.9041	0	4.5126	0	2.9826	0	0	0	6.5655	0	0	0	0
orf19.1765	A0A1D8PIJ7	Uncharacterized protein		0	0	0	0	0	0	12.299	6.7689	0	8.9478	4.0865	7.6941	0	4.377	0	0	0	0
orf19.1658	A0A1D8PJA9	Uncharacterized protein		0	6.7902	0	0	0	0	0	0	4.0196	5.9652	0	0	0	4.377	0	0	0	0
SMF12	A0A1D8PHV2	Divalent metal ion transporter		0	0	0	0	2.5673	0	0	0	0	2.9826	0	0	0	4.377	0	0	0	0
orf19.2246	Q59Z54	Smr domain-containing protein		0	3.3951	3.4447	0	0	0	0	0	0	2.9826	0	0	0	4.377	0	0	0	0
orf19.1534	A0A1D8PGH6	Zn(2+) transporter		0	0	0	4.6738	2.5673	9.8081	0	2.2563	0	0	0	0	0	4.377	0	0	0	0
RPS13	A0A1D8PPE0	Ribosomal 40S subunit protein S13		0	0	0	0	0	4.9041	0	2.2563	0	0	0	0	0	4.377	0	0	0	0
ERP5	A0A1D8PF48			0	0	0	0	0	0	0	0	0	0	0	0	0	4.377	0	0	0	0
orf19.3004	Q5AI48	FAS1 domain-containing protein		0	0	0	0	0	0	0	0	0	0	0	0	0	4.377	0	0	0	0
SIT1	Q5A2T6	Siderophore transporter		0	0	0	0	0	0	0	2.2563	0	0	2.0433	0	0	2.1885	0	0	0	0
SAP1	P0CY27	Candidapepsin-1		0	0	0	2.3369	0	0	0	4.5126	0	2.9826	0	0	0	2.1885	0	0	0	0
HGT19	Q5A7L9			0	0	0	0	0	0	0	4.5126	0	2.9826	0	0	0	2.1885	0	0	0	0
orf19.5847	Q59M52	DNA-directed RNA polymerase subunit beta		0	0	0	0	0	0	3.0747	0	0	2.9826	0	0	0	2.1885	0	0	0	0
orf19.4503	A0A1D8PH93	Uncharacterized protein		0	0	0	0	0	0	0	0	0	2.9826	0	0	0	2.1885	0	0	0	0
SLM2	A0A1D8PPT0	PI 4,5-bisP-binding protein		0	0	0	0	0	0	0	6.7689	0	0	0	0	0	2.1885	0	0	0	0
RPS8A	Q59T44	40S ribosomal protein S8		0	0	0	0	0	0	0	2.2563	0	0	0	0	0	2.1885	0	0	0	0
KGD1	A0A1D8PJ26	Alpha-ketoglutarate dehydrogenase		0	0	0	0	0	0	0	2.2563	0	0	0	0	0	2.1885	0	0	0	0
CTN3	Q59MQ8	Carnitine O-acetyltransferase		0	0	0	0	0	0	0	2.2563	0	0	0	0	0	2.1885	0	0	0	0
NCP1	A0A1D8PLR7	NADPH--cytochrome P450 reductase		0	0	0	0	0	0	0	2.2563	0	0	0	0	0	2.1885	0	0	0	0
orf19.5686	A0A1D8PMU2	Uncharacterized protein		0	0	0	0	0	0	0	2.2563	0	0	0	0	0	2.1885	0	0	0	0
RPL35	A0A1D8PK30	Ribosomal 60S subunit protein L35A		0	0	0	0	0	4.9041	0	0	0	0	0	0	0	2.1885	0	0	0	0
HSP21	Q5AHH4	Small heat shock protein		0	0	0	0	0	4.9041	0	0	0	0	0	0	0	2.1885	0	0	0	0
KEM1	A0A1D8PFP3	5'-3' exoribonuclease 1		0	0	0	0	0	0	0	0	0	0	0	0	0	2.1885	0	0	0	0
RPL20B	A0A1D8PLC9	60S ribosomal protein L20		0	0	0	0	0	0	0	0	0	0	0	0	0	2.1885	0	0	0	0
CNB1	A0A1D8PP58	Calcineurin regulatory subunit B		0	0	0	0	0	0	0	0	0	0	0	0	0	2.1885	0	0	0	0
DPM1	A0A1D8PEA2	Dolichol-P mannosyltransferase subunit 1		0	0	0	0	0	0	0	0	0	0	0	0	0	2.1885	0	0	0	0
HGT10	Q5A8J5	Glucose-inactivated glycerol proton symporter		0	0	0	0	0	0	0	0	0	0	0	0	0	2.1885	0	0	0	0
orf19.92	A0A1D8PPH3	Glutaredoxin domain-containing protein		0	0	0	0	0	0	0	0	0	0	0	0	0	2.1885	0	0	0	0
OFD1	A0A1D8PMB7	Oxidative DNA demethylase		0	0	0	0	0	0	0	0	0	0	0	0	0	2.1885	0	0	0	0
RVS161	Q5AFE4	Regulator of cytoskeleton and endocytosis		0	0	0	0	0	0	0	0	0	0	0	0	0	2.1885	0	0	0	0
CDC12	A0A1D8PCY5	Septin		0	0	0	0	0	0	0	0	0	0	0	0	0	2.1885	0	0	0	0
orf19.2125	A0A1D8PQE6	Uncharacterized protein		0	0	0	0	0	0	0	0	0	0	0	0	0	2.1885	0	0	0	0
orf19.3706	A0A1D8PTL3	Uncharacterized protein		0	0	0	0	0	0	0	0	0	0	0	0	0	2.1885	0	0	0	0
orf19.1536	A0A1D8PGL8	Zn(2+) transporter		0	0	0	0	0	0	0	0	0	0	0	0	0	2.1885	0	0	0	0
SMC6	Q5AGX1	DNA repair protein		0	0	0	0	0	0	0	0	0	0	4.0865	0	0	0	0	0	0	0
BNI1	Q5AL52	Formin		0	0	0	0	0	0	0	0	0	0	4.0865	0	0	0	0	0	0	0
GPA2	A0A1D8PJG1	Guanine nucleotide-binding protein		0	0	3.4447	2.3369	2.5673	0	0	2.2563	0	2.9826	2.0433	0	0	0	0	0	0	0
BMT3	Q5A846	Beta-mannosyltransferase		0	13.58	0	0	0	0	0	0	0	2.9826	2.0433	0	0	0	0	0	0	0
orf19.4530.1	A0A1D8PCL8	AMPK1_CBM domain-containing protein		0	0	0	0	0	0	0	0	0	0	2.0433	0	0	0	0	0	0	0
TRP3	A0A1D8PFC8	Anthranilate/indole-3-glycerol-P synthase		0	0	0	0	0	0	0	0	0	0	2.0433	0	0	0	0	0	0	0
ERG9	A0A1D8PI71	Farnesyl-diP farnesyltransferase/SQ synthase		0	0	0	0	0	0	0	0	0	0	2.0433	0	0	0	0	0	0	0
orf19.6882.1	A0A1D8PHH4	Ribosomal 60S subunit protein L33A		0	0	0	0	0	4.9041	0	0	4.0196	2.9826	0	0	0	0	0	0	0	0
MBF1	Q5A940	Multiprotein-bridging factor		0	0	0	0	0	0	0	0	4.0196	2.9826	0	0	0	0	0	0	0	0
RPS24	Q5A7K0	40S ribosomal protein S24		0	0	0	0	0	9.8081	0	2.2563	0	2.9826	0	0	0	0	0	0	0	0
RPS6A	A0A1D8PL99	40S ribosomal protein S6		0	0	0	0	0	4.9041	0	2.2563	0	2.9826	0	0	0	0	0	0	0	0
YCK2	A0A1D8PKB4	Serine/threonine protein kinase		0	0	0	0	0	0	0	2.2563	0	2.9826	0	0	0	0	0	0	0	0
STT4	A0A1D8PTE0	1-phosphatidylinositol 4-kinase		0	0	0	0	0	0	0	0	0	2.9826	0	0	0	0	0	0	0	0
TTR1	Q5ABB1	Dithiol glutaredoxin		0	0	0	0	0	0	0	0	0	2.9826	0	0	0	0	0	0	0	0
orf19.2820	A0A1D8PS91	FG-nucleoporin		0	0	0	0	0	0	0	0	0	2.9826	0	0	0	0	0	0	0	0
orf19.4749	A0A1D8PEG9	Uncharacterized protein		0	0	0	0	0	0	0	0	0	2.9826	0	0	0	0	0	0	0	0
orf19.323	A0A1D8PJN3	Phospholipid-transporting ATPase		0	0	0	0	0	4.9041	0	9.0252	4.0196	0	0	0	0	0	0	0	0	0
SLK19	Q5ADT0			0	0	0	0	0	0	0	4.5126	4.0196	0	0	0	0	0	0	0	0	0
orf19.4906	A0A1D8PEU9	Uncharacterized protein		0	0	0	0	0	0	0	4.5126	4.0196	0	0	0	0	0	0	0	0	0
PLC2	Q5A0L4			0	0	0	0	0	0	0	2.2563	4.0196	0	0	0	0	0	0	0	0	0
orf19.4346	A0A1D8PNM2	Protein transport protein sec16		0	0	0	0	0	0	3.0747	0	4.0196	0	0	0	0	0	0	0	0	0
YPT52	A0A1D8PFT9	Rab family GTPase		0	0	0	0	0	0	0	0	4.0196	0	0	0	0	0	0	0	0	0
SUP35	Q59YE8	Translation termination factor GTPase		0	0	0	0	0	0	0	0	4.0196	0	0	0	0	0	0	0	0	0
LAP4	A0A1D8PNQ9			0	0	0	0	0	0	0	6.7689	0	0	0	0	0	0	0	0	0	0
DDR48	Q59X49	Stress protein		0	0	0	0	0	0	0	6.7689	0	0	0	0	0	0	0	0	0	0
GDB1	Q59MN2	Glucanotransferase/Amyloglucosidase		0	0	0	2.3369	0	0	0	4.5126	0	0	0	0	0	0	0	0	0	0
orf19.3003	A0A1D8PCX0	Uncharacterized protein		0	0	0	0	0	0	0	4.5126	0	0	0	0	0	0	0	0	0	0
RPL32	A0A1D8PPN6	Ribosomal 60S subunit protein L32		0	0	0	0	0	0	3.0747	2.2563	0	0	0	0	0	0	0	0	0	0
COX9	A0A1D8PHI5	Cytochrome c oxidase subunit 7A		0	0	0	0	0	0	0	2.2563	0	0	0	0	0	0	0	0	0	0
orf19.5671	A0A1D8PL12	MHD domain-containing protein		0	0	0	0	0	0	0	2.2563	0	0	0	0	0	0	0	0	0	0
orf19.688	A0A1D8PPR6	Mitochondrial 37S ribosomal protein		0	0	0	0	0	0	0	2.2563	0	0	0	0	0	0	0	0	0	0
NDE1	Q5AEC9	NADH-ubiquinone reductase		0	0	0	0	0	0	0	2.2563	0	0	0	0	0	0	0	0	0	0
orf19.5411	Q5A7Q5	NEDD8-conjugating protein		0	0	0	0	0	0	0	2.2563	0	0	0	0	0	0	0	0	0	0
RPL30	A0A1D8PM75	Ribosomal 60S subunit protein L30		0	0	0	0	0	0	0	2.2563	0	0	0	0	0	0	0	0	0	0
orf19.3840	Q5A650	Serine/threonine protein kinase		0	0	0	0	0	0	0	2.2563	0	0	0	0	0	0	0	0	0	0
orf19.2296	A0A1D8PF42	Uncharacterized protein		0	0	0	0	0	0	0	2.2563	0	0	0	0	0	0	0	0	0	0
orf19.199	A0A1D8PI97	Uncharacterized protein		0	0	0	0	0	0	0	2.2563	0	0	0	0	0	0	0	0	0	0
VMA10	Q59U85	V-type proton ATPase subunit G		0	0	0	0	0	0	0	2.2563	0	0	0	0	0	0	0	0	0	0
orf19.3325	A0A1D8PCG4	Glycogenin glucosyltransferase		0	0	0	0	2.5673	49.041	0	0	0	0	0	0	0	0	0	0	0	0
GLG2	A0A1D8PKH2			0	0	0	0	0	4.9041	0	0	0	0	0	0	0	0	0	0	0	0
orf19.3572.3	A0A1D8PHF5	Ribosomal 60S subunit protein L31B		0	0	0	0	0	4.9041	0	0	0	0	0	0	0	0	0	0	0	0
orf19.3982	A0A1D8PP39	Aamy domain-containing protein		0	0	0	0	2.5673	0	0	0	0	0	0	0	0	0	0	0	0	0
MAL2	A0A1D8PUB9	Oligo-1,6-glucosidase		0	0	0	0	2.5673	0	0	0	0	0	0	0	0	0	0	0	0	0
VAC8	Q59MN0	Vacuolar protein		0	0	0	0	2.5673	0	0	0	0	0	0	0	0	0	0	0	0	0
GCY1	Q5ADT4	Glycerol 2-dehydrogenase		0	0	0	4.6738	0	0	0	0	0	0	0	0	0	0	0	0	0	0
HOM2	Q5ALM0	Aspartate-semialdehyde dehydrogenase		0	0	0	2.3369	0	0	0	0	0	0	0	0	0	0	0	0	0	0
URA9	Q874I4	Dihydroorotate dehydrogenase		0	0	0	2.3369	0	0	0	0	0	0	0	0	0	0	0	0	0	0
SIL1	Q5A360	Nucleotide exchange factor		0	0	0	2.3369	0	0	0	0	0	0	0	0	0	0	0	0	0	0
VCX1	Q59QB4	Vacuolar calcium ion transporter		0	0	0	2.3369	0	0	0	0	0	0	0	0	0	0	0	0	0	0
orf19.1340	A0A1D8PRB0	Aldo-keto reductase superfamily protein		0	3.3951	3.4447	0	0	0	0	0	0	0	0	0	0	0	0	0	0	0
orf19.216	A0A1D8PIA0	DUF2433 domain-containing protein		0	0	3.4447	0	0	0	0	0	0	0	0	0	0	0	0	0	0	0
MLP1	A0A1D8PL86			0	0	3.4447	0	0	0	0	0	0	0	0	0	0	0	0	0	0	0
CMP1	A0A1D8PCA8	Serine/threonine-protein phosphatase		0	0	3.4447	0	0	0	0	0	0	0	0	0	0	0	0	0	0	0
ALS2	P0CU38	Agglutinin-like protein 2		0	3.3951	0	0	0	0	0	0	0	0	0	0	0	0	0	0	0	0
SNF2	A0A1D8PGK4	SWI/SNF catalytic subunit		0	3.3951	0	0	0	0	0	0	0	0	0	0	0	0	0	0	0	0
orf19.1672	A0A1D8PJB0	Coatomer subunit alpha		0	0	0	0	0	0	0	0	0	0	0	0	0	0	1.2864	0	0	0
ATP20	Q59M30	F1F0 ATP synthase subunit g		0	0	0	0	0	0	0	0	0	0	0	0	0	0	1.2864	0	0	0
FUM11	Q5A6L1	Fumarase		0	0	0	0	0	0	0	0	0	0	0	0	0	0	1.2864	0	0	0
KAP120	A0A1D8PRI4			0	0	0	0	0	0	0	0	0	0	0	0	0	0	1.2864	0	0	0
SNF1	A0A1D8PN61	Non-specific serine/threonine protein kinase		0	0	0	0	0	0	0	0	0	0	0	0	0	0	1.2864	0	0	0
PSP1	A0A1D8PF34			0	0	0	0	0	0	0	0	0	0	0	0	0	0	2.5728	0	0	0
orf19.3459	Q59S81	Serine/threonine/tyrosine protein kinase		0	0	0	0	0	0	0	0	0	0	0	0	0	0	1.2864	0	0	0
SOU1	P87219	Sorbose reductase		0	0	0	0	0	0	0	0	0	0	0	0	0	0	1.2864	0	0	0
orf19.6305	A0A1D8PSW2	Threonine aldolase		0	0	0	0	0	0	0	0	0	0	0	0	0	0	1.2864	0	0	0
SUI2	Q5AAU7	Translation initiation factor		0	0	0	0	0	0	0	0	0	0	0	0	0	0	1.2864	0	0	0
orf19.7288	A0A1D8PTU4	Uncharacterized protein		0	0	0	0	0	0	0	0	0	0	0	0	0	0	1.2864	0	0	0
orf19.577	A0A1D8PN11	Uncharacterized protein		0	0	0	0	0	0	0	0	0	0	0	0	0	0	1.2864	0	0	0
orf19.4228	A0A1D8PND7	Uncharacterized protein		0	0	0	0	0	0	0	0	0	0	0	0	0	0	1.2864	0	0	0
