# Supplementary material for: Coordination of fungal biofilm development by extracellular vesicle cargo
Source: Nat Commun. 2021 Oct 29;12:6235. doi: 10.1038/s41467-021-26525-z (PMC8556236; doi:10.1038/s41467-021-26525-z)
Supplement: Supplementary file 4 — Supplementary Data 2 [file 41467_2021_26525_MOESM4_ESM.xlsx]

## Sheet: ESCRT comparative proteomics
Supplementary Data 2|Comparative proteomics of extracellular vesicles in Candida albicans WT and ESCRT mutants biofilms
Strain	Total proteins	Shared proteins	WT unique	Shared	Upregulated	Downregulated	Mutant unique
		[% of WT]
WT	726	-	-	-	-	-	-
HSE1 -/-	327	45	434	292	105	27	35
VPS27 -/-	250	34.4	500	226	67	33	26
MVB12 -/-	348	47.9	407	319	96	24	29
VPS23 -/-	263	36.2	483	243	55	47	20
VPS28 -/-	204	28.1	546	180	61	38	24
SRN2 -/-	225	31	511	215	54	44	10
VPS25 -/-	325	44.8	429	297	104	45	55
VPS36 -/-	195	26.9	550	176	60	34	19
VPS22 -/-	278	38.3	481	245	71	35	33
VPS2 -/-	278	38.3	468	258	63	33	20
VPS24 -/-	208	28.7	526	200	67	34	8
VPS20 -/-	92	12.7	636	90	20	29	2
SNF7 -/-	384	52.9	399	327	109	39	57
VTI1 -/-	470	64.7	281	445	39	30	25
VPS4 -/-	343	47.2	421	305	83	35	28
BRO1 -/-	352	48.5	427	299	94	32	53
DOA4 -/-	79	10.9	648	78	10	23	1
