# Supplementary material for: Coordination of fungal biofilm development by extracellular vesicle cargo
Source: Nat Commun. 2021 Oct 29;12:6235. doi: 10.1038/s41467-021-26525-z (PMC8556236; doi:10.1038/s41467-021-26525-z)
Supplement: Supplementary file 6 — Supplementary Data 4 [file 41467_2021_26525_MOESM6_ESM.xlsx]

## Sheet: Sheet1
Supplementary Data 4|KEGG/BRITE functional characterization of select Candida albicans biofilm EV cargo protein candidates
KEGG Pathways Level I	KEGG Pathways Level II	KEGG Pathways Level III	Gene
Metabolism	Carbohydrate metabolism	Glycolysis / Gluconeogenesis	HXK2
			PGI1
			TPI1
			ENO1
		Pentose phosphate pathway	PGI1
			TAL1
		Fructose and mannose metabolism	HXK2
			TPI1
			GCA2
		Starch and sucrose metabolism	GCA2
			GSC1
			XOG1
			HXK2
			GPI1
		Amino sugar and nucleotide sugar metabolism	CHT3
			CHT2
			HEX1
			PGI1
		Inositol phosphate metabolism	TPI1
	Energy metabolism	Oxidative phosphorylation	PMA1
		Methane metabolism	ENO1
	Amino acid metabolism	Cysteine and methionine metabolism	MET9
		Arginine and proline metabolism	CAR2
	Metabolism of other amino acids	Selenocompound metabolism	MET6
	Glycan biosynthesis and metabolism	Various types of N-glycan biosynthesis	HEX1
		Other types of O-glycan biosynthesis	MNT1
		Glycosaminoglycan degradation	HEX1
		Glycosphingolipid biosynthesis - globo and isoglobo series	HEX1
		Glycosphingolipid biosynthesis - ganglio series	HEX1
		Other glycan degradation	HEX1
			AMS1
	Metabolism of cofactors and vitamins	Ubiquinone and other terpenoid-quinone biosynthesis	YCP4
	Biosynthesis of other secondary metabolites	Neomycin, kanamycin and gentamicin biosynthesis	HXK2
	Folding, sorting and degradation	Protein processing in endoplasmic reticulum	HSP90
		RNA degradation	ENO1
			HSO60
	Signal transduction	MAPK signaling pathway - yeast	GSC1
			BMH1
BRITE	Signaling and cellular processes	Glycosylphosphatidylinositol (GPI)-anchored proteins	RBT1
			CSA2
			ALS3
		Exosome	HSP90
			ENO1
			BMH1
			HSP60
			PGI1
			CPY1
			MIR1
			TPI1
		Cytoskeleton proteins	ACT1
		Transporters	MIR1
			PET9
			ZRT2
		Ion channels	POR1
	Genetic information processing	Proteasome	orf19.4230
			HSP90
		Messenger RNA biogenesis	ENO1
			HSP60
		Chaperones and folding catalysts	HSP90
			HSP60
			CPY1
			HEX1
			TRX2
		Membrane trafficking	AMS1
			HXK2
			HSP90
			CPY1
		Translation factors	CEF3
		Ribosome biogenesis	orf19.5206
		DNA repair and recombination proteins	BMH1
		Mitochondrial biogenesis	PET9
			POR1
			HSP60
			HSP90
		Chromosome and associated proteins	PHR1
			PGA4
	Metabolism	Glycosyltransferases	MNT1
			GSC1
			PHR1
			PGA4
		Peptidases and inhibitors	SAP6
			SAP5
			SAP4
			orf19.4016
			CPY1
			orf19.4230
		Protein phosphatases and associated proteins	HSP90
