# Supplementary material for: Coordination of fungal biofilm development by extracellular vesicle cargo
Source: Nat Commun. 2021 Oct 29;12:6235. doi: 10.1038/s41467-021-26525-z (PMC8556236; doi:10.1038/s41467-021-26525-z)
Supplement: Supplementary file 7 — Supplementary Data 5 [file 41467_2021_26525_MOESM7_ESM.xlsx]

## Sheet: Sheet1
Supplementary Data 5|Candida albicans biofilm EV cargo protein candidates biofilm formation capacity compared to WT reference
Strain	Biofilm Formation [%WT]
AMS1 -/-	97.5 ± 0.8
CHT3 -/-	100.6 ± 5.1
CRH11 -/-	95.8 ± 3.2
CSH1 -/-	95.7 ± 3.9
ECM33 -/-	90.7 ± 5.4
ENG1 -/-	94.1 ± 5.3
ERV25 -/-	75.4 ± 14.8
GSC1 -/-	92.2 ± 9.3
MET6 -/-	47.3 ± 7.4
MGP1/orf19.1239 -/-	95.2 ± 4.8
MIR1 -/-	13.8 ± 2.6
MNT1 -/-	98.1 ± 3.0
MP65 -/-	100.9 ± 2.0
PET9 -/-	7.2 ± 1.9
PHR1 -/-	95.6 ± 5.5
POR1 -/-	78.3 ± 6.5
PRA1 -/-	53.5 ± 10.0
RAX2 -/-	98.4 ± 1.9
SAP5 -/-	97.4 ± 7.9
SUN41 -/-	85.8 ± 7.0
TOS1 -/-	86.8 ± 13.4
TRX2 -/-	80.7 ± 16.0
XOG1 -/-	94.6 ± 4.3
YCP4 -/-	66.2 ± 15.9
YOS9 -/-	82.8 ± 4.9
ZRT2 -/-	62.3 ± 9.1
