# Supplementary material for: Coordination of fungal biofilm development by extracellular vesicle cargo
Source: Nat Commun. 2021 Oct 29;12:6235. doi: 10.1038/s41467-021-26525-z (PMC8556236; doi:10.1038/s41467-021-26525-z)
Supplement: Supplementary file 8 — Supplementary Data 6 [file 41467_2021_26525_MOESM8_ESM.xlsx]

## Sheet: Sheet1
Supplementary Data 6|Planktonic minimum inhibitory concentration for select cargo mutants compared to WT reference
Strain	MIC [µg/ml]
WT	0.25
AMS1 -/-	0.25
CHR11 -/-	0.25
ECM33 -/-	0.25
ERV25 -/-	0.25
GSC1 -/-	0.25
MIR1 -/-	16
PET9 -/-	1
PHR1 -/-	4
POR1 -/-	0.25
PRA1 -/-	0.25
RAX2 -/-	0.25
SAP5 -/-	0.25
SUN41 -/-	0.25
TOS1 -/-	0.25
XOG1 -/-	0.25
YCP4 -/-	0.25
ZRT2 -/-	0.25
